## Title

Performing Parentage Analysis for Polysomic Inheritances Based on Allelic Phenotypes

## Authors

Kang Huang<sup>1,2</sup>, Gwendolyn Huber<sup>2</sup>, Kermit Ritland<sup>2</sup>, Derek W. Dunn<sup>1</sup>, Baoguo Li<sup>1,3</sup>.

## Affiliations

<sup>1</sup> Shaanxi Key Laboratory for Animal Conservation, College of Life Sciences, Northwest University, Xi'an 710069, China

<sup>2</sup> Department of Forest and Conservation Sciences, University of British Columbia, Vancouver, BC V6T1Z4 Canada

<sup>3</sup> Center for Excellence in Animal Evolution and Genetics, Chinese Academy of Sciences, Kunming 650223, China

## Reference numbers

51

## Running title

Parentage Analysis for Polyploids

## Keywords

Parentage analysis, polysomic inheritance, genotyping ambiguity, double-reduction, null alleles, self-fertilization.

## Corresponding author

Baoguo Li

Address: Shaanxi Key Laboratory for Animal Conservation, College of Life Sciences, Northwest University, Xi'an 710069, China Telephone: +8613572209390; Fax: +86 29 88303304; E-mail: baoguoli@nwu.edu.cn.

# 1 Performing Parentage Analysis for Polysomic Inheritances Based on Allelic Phenotypes

2

3

September 13, 2020

4

## Abstract

5 Polyploidy poses several problems for parentage analysis. We present a new  
6 polysomic inheritance model for parentage analysis based on genotypes or allelic  
7 phenotypes to solve these problems. The effects of five factors are simultaneously  
8 accommodated in this model: (i) double-reduction, (ii) null alleles, (iii) negative am-  
9 plification, (iv) genotyping errors and (v) self-fertilization. To solve genotyping am-  
10 biguity (unknown allele dosage), we developed a new method to establish the likeli-  
11 hood formulas for allelic phenotype data and to simultaneously include the effects of  
12 our five chosen factors. We then evaluated and compared the performance of our new  
13 method with three established methods by using both simulated data and empirical  
14 data from the cultivated blueberry (*Vaccinium corymbosum*). We also developed  
15 and compared the performance of two additional estimators to estimate the geno-  
16 typing error rate and the sample rate. We make our new methods freely available in  
17 the software package POLYGENE, at <http://github.com/huangkang1987/polygene>.

18 **Keywords:** parentage analysis, polysomic inheritance, genotyping ambiguity, double-  
19 reduction, null alleles, self-fertilization.

## 20 Introduction

21 Parentage analysis is a common technique in plant ecology and selective breeding. This technique  
22 for identifying parents enables researchers to assess seed dispersal (Ismail *et al.*, 2017), pollen dispersal  
23 (Bezemer *et al.*, 2016), assortative mating (Monthe *et al.*, 2017), isolation (Tambarussi *et al.*, 2015), cur-  
24 rent gene flow (Duminil *et al.*, 2016), mating systems (Tan *et al.*, 2019), reproductive success (Watanabe

25 *et al.*, 2018), functional sex (Oddou-Muratorio *et al.*, 2018), and to increase genetic gain from selective  
26 breeding (Norman *et al.*, 2018).

27 A large proportion of plant species are polyploid, with 24% of all plant taxa exhibiting some form  
28 of polysomic inheritance (Barker *et al.*, 2016), and at least 47% of angiosperm species having polyploidy  
29 in their ancestral lineage (Wood *et al.*, 2009). Existing methods of parentage analysis for polyploids use  
30 the pseudo-dominant approach (Rodzen *et al.*, 2004; Wang and Scribner, 2014) and exclusion approach  
31 (Zwart *et al.*, 2016). In the pseudo-dominant approach, the polyploid genotypes or the allelic phenotypes  
32 are converted into pseudo-dominant phenotypes and use diploid likelihood equations to calculate the  
33 likelihood for parentage assignment (Gerber *et al.*, 2000), in which each allele at a codominant locus  
34 is treated as an independent dominant ‘locus’. This approach enables rapid calculation but is inferior  
35 to that based on polysomic inheritance methods because any transformation of data will cause a loss  
36 of information and thus a reduction in accuracy (Wang and Scribner, 2014). The exclusion approach  
37 excludes the parents based on Mendelian incompatibility. However, due to the high gamete diversity  
38 (Pelé *et al.*, 2018) and genotyping ambiguity (Huang *et al.*, 2014), the exclusion rate is low in polyploid,  
39 especially for a parent-offspring pair. Thus, the development of more accurate methods of parentage  
40 analysis for polyploids is required.

41 Several models for polysomic inheritance have been developed, such as double-reduction models  
42 (Muller, 1914; Haldane, 1930; Mather, 1935), genotypic frequencies (Fisher, 1943; Geiringer, 1949), and  
43 transitional probabilities from a zygote to a gamete (Fisher and Mather, 1943; Field *et al.*, 2017). On  
44 the basis of these findings, Huang *et al.* (2019) derived the generalized genotypic frequency and gamete  
45 frequency for ploidy levels fewer than 12 and derived the generalized transitional probability from a zygote  
46 to a gamete for any ploidy level. These models provide a foundation on which to establish a method of  
47 parentage analysis for polyploids.

48 A unique feature of polysomic inheritance is *double-reduction* such that a pair of sister chromatids  
49 are segregated into a single gamete (Parisod *et al.*, 2010). Double-reduction arises from a combination of  
50 three major events during meiosis: (i) the crossing-over between non-sister chromatids, (ii) an appropriate  
51 pattern of disjunction, and (iii) the migration of chromosomal segments carrying a pair of sister chromatids  
52 to the same gamete (Darlington, 1929; Haldane, 1930). Geneticists have developed several mathematical  
53 models to simulate double-reduction: these are the *random chromosome segregation* (RCS) model (Muller,

54 1914), the *pure random chromatid segregation* (PRCS) model (Haldane, 1930), the *complete equational*  
55 *segregation* (CES) model (Mather, 1935) and the *partial equational segregation* (PES) model (Huang  
56 *et al.*, 2019). A brief description of each of these models is given in Appendix A.

57 There are two consequences of double-reduction that will influence parentage analysis: (i) the geno-  
58 typic frequencies will deviate from expected values, resulting in a bias of the estimated LOD scores and  
59 (ii) some unexpected offspring genotypes may be generated (e.g. an offspring genotype *AAEE* is pro-  
60 duced from  $ABCD \times EFGH$ ) along with the true father being excluded. Therefore, the complete array  
61 of diverse polyploid offspring genotypes has to be accounted for in order to conduct a comprehensive and  
62 accurate paternity analysis (Stift *et al.*, 2008, 2010).

63 There are also several additional problems associated with PCR-based markers that need to account-  
64 ed for, irrespective of ploidy. One problem is the *genotyping ambiguity* of polyploids (Huang *et al.*, 2014),  
65 in the sense that the allelic dosage of PCR-based markers cannot be determined. For example, the geno-  
66 type *AABB* will appear to be identical to *AAAB*. Another problem arises when using microsatellites,  
67 which are the genetic markers most frequently used for parentage analysis. Microsatellites can have null  
68 alleles (Ravinet *et al.*, 2016) that cause both the lack of amplification of null allele homozygotes and  
69 the lack of detectability of null allele heterozygotes (Wagner *et al.*, 2006). A third problem comes from  
70 genotyping errors, which may cause a true parent to be mistakenly excluded due to an observed lack of  
71 shared alleles with the offspring (Blouin, 2003). Finally, inbreeding will result in an excess of homozygotes  
72 in a population, such as when plants self-fertilize (Ritland, 2002). The genotypic frequencies used for a  
73 parentage analysis will thus be affected by any inbreeding.

74 Here, we extend the disomic inheritance model of Kalinowski *et al.* (2007) to account for polysomic  
75 inheritance to enable accurate parentage analysis for polyploids based on genotypes or allelic phenotypes.  
76 Our new polysomic inheritance model accommodates the effects of five factors: (i) double-reduction,  
77 (ii) null alleles, (iii) negative amplification, (iv) genotyping errors and (v) self-fertilization. To solve the  
78 problem of genotyping ambiguity, we develop a new method so as to establish the likelihood formulas for  
79 allelic phenotype data, with the effects of our five factors of interest also being included in these formulas.  
80 We subsequently use a designated simulated dataset to evaluate and compare the performance of our new  
81 method with three other established methods. We also use an empirical microsatellite dataset from the  
82 cultivated blueberry (*Vaccinium corymbosum*) to test the performance of all four methods. Moreover,

83 we develop and evaluate two models to estimate the genotyping error rate and the sample rate. We have  
84 incorporated our new parentage analysis methods in to the software package POLYGENE, which can be  
85 freely downloaded at <http://github.com/huangkang1987/polygene>.

## 86 Theory and modelling

87 Here we assume that our parentage analysis model satisfies four assumptions, which are also com-  
88 monly used for diploid population genetics methods. These four assumptions are: (i) the population is  
89 large enough to negate any effects of genetic drift and there is no population subdivision; (ii) the mating is  
90 not only random but also independent of both the genetic markers used and the parental mating system,  
91 (iii) the distributions of the genotypes are the same for males and females, and reach an equilibrium  
92 state (i.e. genotypic frequencies do not change among generations) and (iv) the genetic markers used are  
93 autosomal, codominant and unlinked.

94 The multiset consisting of allele copies within an individual at a locus is called a *genotype*, denoted  
95 by  $\mathcal{G}$  or  $G$ , in which  $\mathcal{G}$  represents an observed genotype and  $G$  represents a true genotype. For example,  
96  $\{A, A, A, B\}$  is a genotype, abbreviated as  $AAAB$ . The set consisting of alleles within an individual at  
97 a locus is called an *allelic phenotype*, or a *phenotype* for short, denoted by  $\mathcal{P}$ . For instance,  $\{A, B\}$  is a  
98 phenotype, written as  $AB$  for short.

99 Our methods are the extensions of Kalinowski *et al.*'s (2007) method. In the following text, we  
100 briefly describe the scheme of Kalinowski *et al.*'s (2007) method and its associated diploid model.

## 101 Scheme of simulation-based likelihood approach

102 The foundations for assigning parentage with confidence by a simulation-based likelihood approach  
103 were established by Marshall *et al.* (1998). There are three typical categories in this approach: (i) identifying  
104 the father (or one parent) when the mother (or the other parent) is unknown; (ii) identifying the father  
105 (or one parent) when the mother (or the other parent) is known; and (iii) identifying the father and the  
106 mother (or parents) jointly. There are two situations in the third category, the first is for dioecious species  
107 and the sexes of individuals are recorded (termed sexes known), and the second is for monoecious species  
108 or the sexes of individuals are not recorded (termed sexes unknown). The procedures of a parentage  
109 analysis are broadly as follows.

110 For each of the first two categories, two hypotheses are established: the *first hypothesis* is that the

111 alleged father is the true father, denoted by  $H_1$ ; the *alternative hypothesis* is that the alleged father is  
112 not the true father, denoted by  $H_2$ . For the third category, ‘father’ needs to be changed to ‘parents’ in  
113 both hypotheses.

114 Given a hypothesis  $H$ , the *likelihood* is defined as the probability of some observed data given  $H$ ,  
115 written as  $\mathcal{L}(H)$ . Returning to  $H_1$  and  $H_2$  as described above, we call the natural logarithm of the ratio  
116 of  $\mathcal{L}(H_1)$  to  $\mathcal{L}(H_2)$  the *LOD score*, or *LOD* as the abbreviation, symbolically  $\text{LOD} = \ln \frac{\mathcal{L}(H_1)}{\mathcal{L}(H_2)}$ . Moreover,  
117 if a LOD is positive, it means that  $H_1$  is more likely to be true than  $H_2$ . Similarly, a negative LOD  
118 means that  $H_2$  is more likely to be true than  $H_1$ .

119 Marshall *et al.* (1998) provided a statistic  $\Delta$  for resolving paternity, the definition of which is:

$$\Delta = \begin{cases} \text{LOD}_1 - \text{LOD}_2 & \text{if } n \geq 2, \\ \text{LOD}_1 & \text{if } n = 1, \\ \text{undefined} & \text{if } n = 0, \end{cases}$$

120 where  $\text{LOD}_1$  and  $\text{LOD}_2$  are respectively the LODs of the most-likely and the next most-likely alleged  
121 fathers, and  $n$  is the number of all alleged fathers. For a practical application, the statistic  $\Delta$  needs to be  
122 singly calculated for each individual offspring. Monte-Carlo simulations are subsequently used to assess  
123 the confidence level of  $\Delta$ . The symbol  $\Delta_{0.95}$  represents that the threshold of  $\Delta$  reaches the confidence  
124 level 95%, in the sense that if  $\Delta \geq \Delta_{0.95}$ , the probability that the assigned parent is the true parent is  
125 at least 0.95.

126 The likelihood equations used in Marshall *et al.* (1998) to accommodate genotyping error miscalcu-  
127 late the probability of observing an erroneous genotype. Therefore, we applied the corrected equations  
128 in Kalinowski *et al.* (2007) in the following.

## 129 **Marshall *et al.*’s (1998) diploid model**

130 Marshall *et al.*’s (1998) diploid model (abbreviated as the Ma-model) accounts for any genotyping  
131 errors under the assumption that the genotype frequencies accord with the Hardy-Weinberg equilibrium  
132 (HWE). This model consists of some likelihood formulas (listed in the first half of Appendix B) together  
133 with the rules and methods for a general parentage analysis.

134 The likelihood formulas of the Ma-model are derived by using the transitional probability  $T(\mathcal{G} | G)$   
135 from a true genotype  $G$  to an observed genotype  $\mathcal{G}$ , whose expression is

$$T(\mathcal{G} | G) = (1 - e)\mathcal{B}_{G=\mathcal{G}} + e \text{Pr}(\mathcal{G}), \quad (1)$$

136 where  $e$  is the genotyping error rate,  $\Pr(\mathcal{G})$  is the frequency of  $\mathcal{G}$ , and  $\mathcal{B}_X$  is a binary variable, such that  
137  $\mathcal{B}_X = 1$  if the expression  $X$  is true, or  $\mathcal{B}_X = 0$  otherwise.

138 As previously stated, the procedures underlying the Ma-model to perform a parentage analysis are as  
139 follows: (i) calculating  $\mathcal{L}(H_1)$  and  $\mathcal{L}(H_2)$ , (ii) finding the threshold of  $\Delta$ , (iii) calculating the LOD and  
140  $\Delta$ , and (iv) using the values obtained in the previous three steps to assess the confidence level of this  
141 parentage analysis.

142 In the following text, we will use the first category in a parentage analysis as an example to show  
143 how to calculate the likelihoods  $\mathcal{L}(H_1)$  and  $\mathcal{L}(H_2)$  in the Ma-model. The expressions of  $\mathcal{L}(H_1)$  and  $\mathcal{L}(H_2)$   
144 are

$$\begin{aligned}\mathcal{L}(H_1) &= \Pr(\mathcal{G}_A) [(1 - e)^2 T(\mathcal{G}_O | \mathcal{G}_A) + 2e(1 - e) \Pr(\mathcal{G}_O) + e^2 \Pr(\mathcal{G}_O)], \\ \mathcal{L}(H_2) &= \Pr(\mathcal{G}_A) \Pr(\mathcal{G}_O),\end{aligned}\tag{2}$$

145 where  $\mathcal{G}_A$  and  $\mathcal{G}_O$  are respectively the observed genotypes of the alleged father and the offspring,  $\Pr(\mathcal{G}_A)$   
146 and  $\Pr(\mathcal{G}_O)$  are their frequencies, and  $T(\mathcal{G}_O | \mathcal{G}_A)$  is the transitional probability from  $\mathcal{G}_A$  to  $\mathcal{G}_O$ .

147 In the Ma-model, the genotyping error is considered as the replacement of a true genotype with a  
148 random genotype according to the genotypic frequencies. Thus the genotyping error does not change the  
149 distribution of the genotypes, i.e.  $\Pr(\mathcal{G}) = \Pr(G = \mathcal{G})$ . Moreover,  $\Pr(G)$  can be directly calculated from  
150 the HWE prediction:

$$\Pr(G) = \begin{cases} p_i^2 & \text{if } G = A_i A_i, \\ 2p_i p_j & \text{if } G = A_i A_j. \end{cases}$$

151 This is because any null alleles, any negative amplification (i.e. amplification failure due to experimental  
152 error or a poor DNA quality, rather than a null allelic homozygote) and any inbreeding/selfing are not  
153 considered in the Ma-model.

154 Next, the transitional probability  $T(\mathcal{G}_O | \mathcal{G}_A)$  is calculated under the assumptions that  $\mathcal{G}_A$  and  $\mathcal{G}_O$  are  
155 correctly typed and that the alleged father is the true father, i.e. under the assumptions that  $G_O = \mathcal{G}_O$   
156 and  $G_F = \mathcal{G}_A$ , where  $G_O$  and  $G_F$  are the true genotypes of the offspring and the true father, respectively.  
157 Therefore,  $T(\mathcal{G}_O | \mathcal{G}_A)$  is the same as  $T(G_O | G_F)$  under these assumptions. Because one allele within  $G_O$   
158 is randomly inherited from the parents, and the other is randomly sampled from the population according  
159 to the allele frequencies, the transitional probability  $T(G_O | G_F)$  can be expressed as



$$T(G_O | G_F) = \begin{cases} p_i & \text{if } G_O = A_i A_i \text{ and } G_F = A_i A_i, \\ p_j & \text{if } G_O = A_i A_j \text{ and } G_F = A_i A_i, \\ \frac{1}{2}(p_i + p_j) & \text{if } G_O = A_i A_j \text{ and } G_F = A_i A_j, \\ \frac{1}{2}p_k & \text{if } G_O = A_i A_k \text{ and } G_F = A_i A_j, \\ 0 & \text{otherwise,} \end{cases}$$

160 where  $A_i$ ,  $A_j$  and  $A_k$  are distinct identical-by-state alleles,  $p_i$ ,  $p_j$  and  $p_k$  are their frequencies.

161 Now, we see that the two likelihood formulas in Equation (2) can be used for the actual calculation  
162 as long as the values of the genotyping error rate  $e$  and those frequencies of alleles are given.

163 For the second and third categories in a parentage analysis, to calculate the transitional probabili-  
164 ties  $T(\mathcal{G}_O | \mathcal{G}_A, \mathcal{G}_M)$  and  $T(\mathcal{G}_O | \mathcal{G}_A, \mathcal{G}_{AM})$  in the likelihood formulas in the Ma-model(see the first half of  
165 Appendix B), we need to apply the transitional probability  $T(G_O | G_F, G_M)$  from a pair of true geno-  
166 types of the true parents to a true genotype of the offspring. Because the genotypic frequencies in the  
167 Ma-model accord with the HWE, according to the Mendelian segregation (i.e. each parent randomly  
168 contributes one allele to an offspring genotype),  $T(\mathcal{G}_O | \mathcal{G}_A, \mathcal{G}_M)$  can be calculated by

$$T(G_O | G_F, G_M) = \frac{1}{4} \sum_{i=1}^2 \sum_{j=1}^2 \mathcal{B}_{G_O=A_i B_j},$$

169 where  $A_i$  (or  $B_j$ ) is an allele within  $G_F$  (or  $G_M$ ).

## 170 Polyploid model

171 The polysomic inheritance model (abbreviated as the *polyploid model*) presented here is for use with  
172 even levels of ploidy, and consists of some likelihood formulas and some additional conditions along with  
173 the rules and methods for a general parentage analysis. These additional conditions are: (i) which of the  
174 two data types (genotypic and phenotypic) are to be selected, (ii) whether self-fertilization is considered,  
175 (iii) whether null alleles and/or negative amplifications are to be considered, and (iv) which of the four  
176 double-reduction models, listed in Table S1, is chosen.

177 As for the Ma-model, our new model accommodates the effect of genotyping errors and the presence  
178 of these errors will not change the genotypic and phenotypic frequencies. Moreover, if self-fertilization is  
179 considered in our model, its effect will also be incorporated into the likelihood formulas.

180 For the genotypic data, the likelihood formulas for all three categories in a parentage analysis,  
181 under either self-fertilization or not, are given in Appendix B. For polysomic inheritance, the genotypic

182 frequencies ( $\Pr(\mathcal{G})$ ) and transitional probabilities ( $T(G_O | G_F)$  and  $T(G_O | G_F, G_M)$ ) need to be properly  
 183 adjusted, where the formula of  $\Pr(\mathcal{G})$  under inbreeding and double-reduction is given in Appendix C (or  
 184 in Huang *et al.* (2019)), and the formulas of  $T(G_O | G_F)$  and  $T(G_O | G_F, G_M)$  are given in Appendix D.

185 For the phenotypic data, the likelihood formulas for all three categories in a parentage analysis un-  
 186 der the condition of either self-fertilization or not are given in Appendix E. In such circumstances, the  
 187 phenotypic frequencies ( $\Pr(\mathcal{P})$ ) in these formulas are calculated by Equation (A5), and the transitional  
 188 probabilities ( $T(\mathcal{P}_O | \mathcal{P}_F)$  and  $T(\mathcal{P}_O | \mathcal{P}_F, \mathcal{P}_M)$ ) by Equation (3) or (4). To solve the problem of geno-  
 189 typing ambiguity, we develop a new method termed the PHENOTYPE method. In this method, the prior  
 190 probabilities of phenotypes and the transitional probability from a phenotype to another phenotype will  
 191 be used to establish various likelihood formulas.

## 192 Phenotype method

193 We begin our discussion with the symbol  $\mathcal{G} \triangleright \mathcal{P}$ , whose meaning is that  $\mathcal{G}$  is a genotype determining  
 194 the phenotype  $\mathcal{P}$ , i.e.  $\mathcal{G} \supseteq \mathcal{P}$  and  $\forall A \in \mathcal{G} \rightarrow A \in \mathcal{P}$ , where  $\supseteq$  is the inclusion of multisets. If the null  
 195 alleles (e.g.  $A_y$ ) are considered, the conditions should be revised to  $\mathcal{G} \supseteq \mathcal{P}$  and  $\forall A \in \mathcal{G} \rightarrow A \in \mathcal{P} \cup \{A_y\}$ .  
 196 Under the revised conditions, our models will accommodate the effect of null alleles.

197 The formulas of transitional probabilities  $T(\mathcal{P}_O | \mathcal{P}_F)$  and  $T(\mathcal{P}_O | \mathcal{P}_F, \mathcal{P}_M)$  are first established, whose  
 198 expressions are

$$T(\mathcal{P}_O | \mathcal{P}_F) = \sum_{\mathcal{G}_F \triangleright \mathcal{P}_F} \sum_{\mathcal{G}_O \triangleright \mathcal{P}_O} \Pr(\mathcal{G}_F | \mathcal{P}_F) T(\mathcal{G}_O | \mathcal{G}_F) T(\mathcal{P}_O | \mathcal{G}_O), \quad (3)$$

$$T(\mathcal{P}_O | \mathcal{P}_F, \mathcal{P}_M) = \sum_{\mathcal{G}_F \triangleright \mathcal{P}_F} \sum_{\mathcal{G}_M \triangleright \mathcal{P}_M} \sum_{\mathcal{G}_O \triangleright \mathcal{P}_O} \Pr(\mathcal{G}_F | \mathcal{P}_F) \Pr(\mathcal{G}_M | \mathcal{P}_M) T(\mathcal{G}_O | \mathcal{G}_F, \mathcal{G}_M) T(\mathcal{P}_O | \mathcal{G}_O), \quad (4)$$

199 where  $\mathcal{G}_F$  ( $\mathcal{G}_M$  or  $\mathcal{G}_O$ ) is taken from all genotypes determining  $\mathcal{P}_F$  ( $\mathcal{P}_M$  or  $\mathcal{P}_O$ );  $\Pr(\mathcal{G}_F | \mathcal{P}_F)$  and  
 200  $\Pr(\mathcal{G}_M | \mathcal{P}_M)$  are two posterior probabilities, which can be calculated by the Bayes formula

$$\Pr(\mathcal{G} | \mathcal{P}) = \frac{T(\mathcal{P} | \mathcal{G}) \Pr(\mathcal{G})}{\Pr(\mathcal{P})};$$

201 and  $T(\mathcal{P}_O | \mathcal{G}_O)$  is the transitional probability from  $\mathcal{G}_O$  to  $\mathcal{P}_O$ , which is calculated by

$$T(\mathcal{P} | \mathcal{G}) = \mathcal{B}_{\mathcal{P}=\emptyset} \beta + \mathcal{B}_{\mathcal{G} \triangleright \mathcal{P}} (1 - \beta),$$

202 in which  $\beta$  is the negative amplification rate, and  $\mathcal{P} = \emptyset$  means that  $\mathcal{P}$  is a negative phenotype (it may  
 203 be caused by either a null allele homozygote or a negative amplification).

204 Because each genotype may encounter an amplification failure, the candidate genotypes determining  
205 a negative phenotype at a locus are, strictly speaking, all possible genotypes at this locus. This will  
206 create a problem for the calculations of the transitional probabilities. This is because there are up to  
207  $\binom{v+K-1}{v}$  genotypes at a locus, where  $v$  is the ploidy level and  $K$  is the number of alleles at this locus.  
208 For example, the number of genotypes at an octo-allelic locus for tetrasomic (hexasomic, octosomic or  
209 decasomic) inheritance is up to 330 (1716, 6435 or 19448). For this reason, we do not consider the  
210 candidate genotypes determining any negative phenotypes. In other words, all negative phenotypes are  
211 discarded in the polysomic inheritance model during the analytical process. However, they will still be  
212 used in the allele frequency estimation so as to estimate the negative amplification rate  $\beta$  and the null  
213 allele frequency  $p_y$ .

214 Next, the likelihood formulas for all three categories are established. For example, if self-fertilization  
215 is not considered, the likelihoods  $\mathcal{L}(H_1)$  and  $\mathcal{L}(H_2)$  for the first category can be simply obtained by  
216 replacing  $\mathcal{G}_A$  with  $\mathcal{P}_A$  and  $\mathcal{G}_O$  with  $\mathcal{P}_O$  in Equation (2), whose expressions are

$$\begin{aligned}\mathcal{L}(H_1) &= \Pr(\mathcal{P}_A) [(1-e)^2 T(\mathcal{P}_O | \mathcal{P}_A) + 2e(1-e) \Pr(\mathcal{P}_O) + e^2 \Pr(\mathcal{P}_O)], \\ \mathcal{L}(H_2) &= \Pr(\mathcal{P}_A) \Pr(\mathcal{P}_O),\end{aligned}$$

217 where  $\Pr(\mathcal{P}_A)$  and  $\Pr(\mathcal{P}_O)$  are respectively the frequencies of  $\mathcal{P}_A$  and  $\mathcal{P}_O$ , which can be calculated by  
218 Equation (A5), and the transitional probability  $T(\mathcal{P}_O | \mathcal{P}_A)$  is calculated by replacing  $\mathcal{P}_F$  with  $\mathcal{P}_A$  in  
219 Equation (3), i.e.  $T(\mathcal{P}_O | \mathcal{P}_A) = T(\mathcal{P}_O | \mathcal{P}_F = \mathcal{P}_A)$ . The likelihood formulas for each category under the  
220 condition of either self-fertilization or not are given in Appendix E.

## 221 Estimation of genotyping error rate

222 For a genotypic dataset, it is mathematically impossible to estimate the genotyping error rate  $e$   
223 without any additional information (e.g. the information of pedigree or replication). We will develop  
224 a genotyping error rate estimator based on the pedigree data, including the known parents and the  
225 identified parents (at a high confidence level, e.g. 99%). We refer to a parent-offspring pair extracted  
226 from the pedigree data as a *reference pair*, and a father-mother-offspring trio as a *reference trio*.

227 For genotypic data, we assume that the allelic dosage is known so there are no null alleles. For the  
228 phenotypic input, all candidate genotypes and their gametes will be extracted, including the genotypes  
229 with null alleles, and the pair (or trio) mismatch is identified by whether the parent (or the parents) is  
230 able to produce the offspring (see Appendix I for details). Therefore, each mismatch in our models can

231 only be caused by genotyping errors or the false parent(s). Pair mismatches can be used in all three  
232 categories, but trio mismatches can only be used in the second and the third categories. In this section,  
233 we will use pair mismatches to describe how to estimate the genotyping error rate.

234 Let  $\delta$  be the probability of observing a pair mismatch in a true parent-offspring pair under the  
235 condition that any individual has been erroneously genotyped. In our genotyping error model,  $\delta$  is  
236 equal to the exclusion rate for the first category, i.e. the probability that two random genotypes are  
237 mismatched. We do not estimate  $\delta$  by simulation or by allele frequencies because those approaches can  
238 be influenced by the errors in the estimated parameters. Instead, we directly estimate  $\delta$  from the input  
239 genotypes/phenotypes with a Monte-Carlo algorithm, whose procedures are broadly as follows: randomly  
240 sample a large number of individual pairs from the input samples with replacement, and then treat each  
241 as a parent-offspring pair, and finally calculate the probability that their genotypes/phenotypes at a locus  
242 are mismatched, which is used as  $\hat{\delta}$  at this locus.

243 Let  $\gamma$  be the probability of observing a pair mismatch in a true parent-offspring pair. Since each  
244 mismatch observed in the true parent-offspring pairs can only be caused by the genotyping error, if we  
245 denote  $E$  for  $1 - (1 - e)^2$ , then  $\gamma = E\delta$ . Noticing that the estimate  $\hat{\gamma}$  can be calculated from the reference  
246 pairs in a single application or in all available applications based on the same dataset, the single-locus  
247 estimate  $\hat{E}_l$  of  $E$  at the  $l^{\text{th}}$  locus can be expressed as  $\hat{E}_l = \hat{\gamma}_l / \hat{\delta}_l$ .

248 If we assume that there are  $n_{rl}$  reference pairs at the  $l^{\text{th}}$  locus and that  $n_{ml}$  is the number of pair  
249 mismatches in these reference pairs, then  $n_{ml}$  as a random variable obeys the binomial distribution  
250  $B(n_{rl}, \gamma_l)$ , so  $\text{Var}(n_{ml}) = n_{rl}\gamma_l(1 - \gamma_l)$ . Because  $1 - \gamma_l$  is close to one, the variance  $\text{Var}(\hat{\gamma}_l)$  can be  
251 approximately expressed as  $\text{Var}(\hat{\gamma}_l) \approx \gamma_l/n_{rl}$ . Because  $\hat{E}_l = \hat{\gamma}_l/\hat{\delta}_l$  and  $\gamma = E\delta$ , then  $\text{Var}(\hat{E}_l\hat{\delta}_l) \approx$   
252  $(E\delta_l)/n_{rl}$ . Now, by substituting  $\delta_l$  with  $\hat{\delta}_l$ , it follows that  $\text{Var}(\hat{E}_l) \approx E/(n_{rl}\hat{\delta}_l)$ . To minimize the variance  
253 of  $\text{Var}(\hat{E})$ , the inverse of  $\text{Var}(\hat{E}_l)$  can be used as the weight to calculate the multi-locus estimate  $\hat{E}$ .  
254 The unified weight  $w_l$  is therefore equal to  $n_{rl}\hat{\delta}_l/(\sum_{l'} n_{r'l'}\hat{\delta}_{l'})$ , and  $\hat{E} = \sum_l w_l\hat{E}_l$ . Because the loci are  
255 unlinked, we have  $\text{Var}(\hat{E}) = \sum_l w_l^2 \text{Var}(\hat{E}_l)$ , hence  $\text{Var}(\hat{E}) \approx E/(\sum_l n_{rl}\hat{\delta}_l)$ .

256 The genotyping error rate  $e$  can now be estimated by the formula  $\hat{e} = 1 - \sqrt{1 - \hat{E}}$ . Moreover,  
257 because  $e \approx E/2$ , the variance  $\text{Var}(\hat{e})$  can be approximately expressed as  $\text{Var}(\hat{e}) \approx e/(2\sum_l n_{rl}\hat{\delta}_l)$ . As  
258 described above, the inverse of  $\text{Var}(\hat{e})$  can be used to weight  $\hat{e}$  in multiple applications and datasets.

259 When the polyploid phenotypes are used, pair mismatches will be rare. Specifically, they are rare for

260 the first category, because the single-locus exclusion rate is low (e.g. 0.01 for the hexaploid phenotypes  
261 at a hexa-allelic locus). Therefore, it is inaccurate to estimate  $e$  by pair mismatches. Relative to the first  
262 category, the single-locus exclusion rate for the second or the third categories is high (e.g. 0.27 for the  
263 hexaploid phenotypes at a hexa-allelic locus). Hence, we can use trio mismatches to reliably estimate the  
264 genotyping error rates for the second and the third categories, and the details are described in Appendix  
265 F.

## 266 Estimation of sample rate

267 For an individual offspring, the probability that one of its true parents is sampled is defined as the  
268 *sample rate*, denoted by  $p_s$ . The probability that an alleged parent (or a pair of alleged parents) of an  
269 offspring is assigned at a confidence level is called the *assignment rate*, denoted by  $a$ . Specifically, we  
270 denote  $a_c$  for the assignment rate when the true parent(s) is sampled, and  $a_u$  for the assignment rate  
271 when the true parent(s) is not sampled. Therefore,  $a$  is a weighted average of  $a_c$  and  $a_u$ .

272 We now develop a simple but robust estimator to estimate the sample rate from the assignment rate  
273 and begin our discussion with how to estimate the sample rate by using one application. For convenience,  
274 we will replace ‘the father’ with ‘one parent’ and ‘the mother’ with ‘the other parent’ in the first and the  
275 second categories in a parentage analysis.

276 For the first and the second categories, we have  $a = p_s a_c + (1 - p_s) a_u$ , so  $p_s$  can be estimated by

$$\hat{p}_s = \frac{\hat{a} - \hat{a}_u}{\hat{a}_c - \hat{a}_u}. \quad (5)$$

277 For the third category, if the sexes are known, then  $a = p_s^2 a_c + (1 - p_s^2) a_u$ , so  $p_s$  can be estimated by

$$\hat{p}_s = \sqrt{\frac{\hat{a} - \hat{a}_u}{\hat{a}_c - \hat{a}_u}}. \quad (6)$$

278 If the sexes are unknown, then  $a = p_c a_c + (1 - p_c) a_u$ , where  $p_c$  is the probability that the true parents  
279 are sampled, which can be expressed as  $p_c = s_u p_s + (1 - s_u) p_s^2$ , in which  $s_u$  is the proportion of selfed  
280 offspring in this application. Hence  $\hat{p}_c = \frac{\hat{a} - \hat{a}_u}{\hat{a}_c - \hat{a}_u}$ , and the sample rate  $p_s$  can be estimated by

$$\hat{p}_s = \frac{\hat{s}_u - \sqrt{\hat{s}_u^2 + 4\hat{p}_c - 4\hat{s}_u\hat{p}_c}}{2\hat{s}_u - 2}. \quad (7)$$

281 The value of  $\hat{p}_s$  may be less than zero or greater than one. If this happens, we will truncate the  
282 value into the acceptable range  $[0, 1]$ . We will also set multiple confidence levels to estimate the selfing

283 rate  $s_u$  for increased accuracy. For the situations of multiple applications and multiple confidence levels,  
284 the estimation of the sampling rate is shown in Appendix G, along with the estimation of  $s_u$ .

## 285 Data Availability

286 POLYGENE is written in C++ and C#, whose executables (Windows, Ubuntu and Mac OS X), source  
287 code and user manual are available on GitHub (<http://github.com/huangkang1987/polygene>).

288 The simulation functions are ‘private void SIM\_PARENT1()’ to ‘private void SIM\_PARENT3()’  
289 in ‘Form1.cs’. The simulation parameters, output files, description of I/O format, figure plotting script  
290 and empirical dataset are available on the website of this journal.

## 291 Evaluation

292 In this study, we use a computer simulation to create the genotypic and phenotypic datasets with  
293 disomic, tetrasomic or hexasomic inheritance, and then perform our parentage analysis by using these  
294 datasets. The performances of four methods under the same conditions are compared by four typical  
295 applications, where one method is the PHENOTYPE method, and the others are named the DOMINANT  
296 method (Rodzen *et al.*, 2004) (named after the pseudo-dominant data used in this method), the SIBSHIP  
297 method (Wang, 2016) (originating from the application ‘sibship reconstruction’) and the EXCLUSION  
298 method (Zwart *et al.*, 2016). The accuracies of these four methods under natural conditions are tested  
299 with an empirical microsatellite dataset for the highbush blueberry (Huber, 2016). In addition, the  
300 performances of the genotyping error rate estimation and the sample rate estimation are also evaluated  
301 using the simulated datasets.

302 Both the DOMINANT and the SIBSHIP methods rely on first transforming the polyploid codominant  
303 phenotypic data into pseudo-dominant data. The same procedure as Kalinowski *et al.* (2007) is used  
304 for the DOMINANT method, and the likelihood formulas under this method are listed in Appendix H,  
305 whose derivations are given by Gerber *et al.* (2000). Under the SIBSHIP method, a simulated-annealing  
306 algorithm is used to find the classification of optimal full-sib (or half-sib) families for the whole dataset by  
307 maximizing the likelihood, which is implemented in the software package COLONY (Wang and Scribner,  
308 2014). Under the EXCLUSION method, the effects of double-reduction and null alleles are incorporated,  
309 and the details of this method are described in Appendix I.

## 310 Simulated data

311 In order to evaluate these methods, we create some theoretical monoecious populations, each con-  
312 sisting only of individuals with disomic to decasomic inheritance for the genotypic data or disomic to  
313 hexasomic inheritance for the phenotypic data. We assumed that the population under scrutiny is geno-  
314 typed at  $L$  unlinked loci under the PES model (Huang *et al.*, 2019). The number of loci  $L$  is set from  
315 three to 12 (genotypes) or three to 18 (phenotypes) at an interval of three. The distance (in centimor-  
316 gans) between each of these loci and its corresponding centromere is drawn from the uniform distribution  
317  $U(0, 100)$ . The single chromatid recombination rate  $r_s$  is obtained by Haldane's mapping function. Each  
318 locus is located with six amplifiable alleles that have uniform initial frequencies, with the initial null  
319 allele frequency set as 0.1 for the phenotypic data. For the genotypic data, null alleles are not simulated  
320 because the dosage of alleles within each genotype is known.

321 Huang *et al.* (2019) derived the genotypic frequencies under each of the four double-reduction models  
322 listed in Table S1. However, the analytical solution of genotypic frequencies under inbreeding/selfing and  
323 double-reduction is still unknown. As an alternative, we give an approximated solution in Appendix C by  
324 using the inbreeding coefficient  $F$  as an intermediate variable with the assumption that any inbreeding  
325 is only caused by self-fertilization. With this approximation, we generate the genotypes of the founder  
326 generation by Equation (A4). In order to let the genotypic frequencies reach their equilibrium state and  
327 avoid severe genetic drift, 2000 individuals are generated for the founder generation, and the population  
328 is allowed to reproduce for ten generations, each generation consisting of 2000 individuals.

329 During reproduction, the parents of each offspring are either two distinct individuals randomly  
330 chosen from the previous generation at a probability of  $1 - s$ , or the same individual (for self-fertilization)  
331 randomly chosen from the previous generation at a probability of  $s$ . The selfing rate  $s$  is set as three levels  
332 (0, 0.1 and 0.3). The following three procedures are designed to simulate meiosis: (i) the chromosomes  
333 are randomly paired and the alleles are exchanged between the pairing chromosomes at a probability of  
334  $r_s$ ; (ii) the chromosomes are randomly segregated into two secondary oocytes; and (iii) the alleles within  
335 a chromosome are randomly segregated into two gametes. Fertilization is then simulated by the merging  
336 of two gametes.

337 Next, we reproduce two additional generations, each consisting of 100 individuals, to be used as the  
338 parents and offspring for the subsequent analyses. To simulate the missing parents, 90% of parents and all

339 offspring are sampled. To simulate the genotyping errors, each genotype is swapped with the genotype of  
340 another individual at the same locus at a probability of  $\frac{1}{2}e$  (where  $e$  is set as 0.01). To simulate negative  
341 amplification, each genotype is randomly set as  $\emptyset$  at a probability of  $\beta$  (where  $\beta$  is set as 0.05). The  
342 phenotypes are obtained by removing both the null and the duplicated alleles within genotypes. Then  
343 the generated genotypic (or phenotypic) dataset is used to perform the parentage analysis. The allele  
344 frequency estimation is described in Appendix J.

345 For the first two categories in a parentage analysis, each is designated its own application (named  
346 Application (i) or (ii)). Application (iii) refers to a third category in which the alleged fathers and  
347 the alleged mothers are drawn from two different collections (representing that the sexes are known).  
348 Application (iv) also refers to the third category in which the alleged fathers and the alleged mothers are  
349 drawn from the same collection (representing that the sexes are unknown).

350 In Application (i), for each of the 100 offspring, 89 individuals from the parental generation are used  
351 as alleged fathers. Application (ii) is performed for the offspring with their mother sampled. In this  
352 application, for each offspring, the true mother is known, and 89 individuals from the parental generation  
353 are used as the alleged fathers. For Applications (i) and (ii), the alleged fathers will include the true  
354 father if sampled but will exclude the true mother (except the offspring is the product of self-fertilisation)  
355 to avoid interference. In Application (iii), for each offspring, 45 individuals (including the true father  
356 if sampled) from the parental generation are considered as the alleged fathers, with the remaining 45  
357 individuals (including the true mother if sampled) as the alleged mothers. In Application (iv), for each  
358 offspring, all 90 individuals in the parental generation are considered as the alleged parents. We perform  
359 100 replications for each of the three configurations:  $v$ ,  $L$  and  $s$ , and calculate the average correct  
360 assignment rate for each configuration. Here, a *correct assignment* means that the true parents have  
361 been assigned and the value of  $\Delta$  is higher than the corresponding threshold.

362 For the PHENOTYPE method, there are many models to estimate the allele frequencies and the related  
363 parameters, and the ideal way is to try each and then choose the optimal one with the smallest *Bayesian*  
364 *information criterion* (BIC) (as in Huang *et al.*, 2020). However, it is time consuming to evaluate each  
365 of them in each simulation. As an alternative, we choose two models that work well in most situations:  
366  $\text{PES}_{0.25} + p_y + \beta + s$  for the phenotypic data and  $\text{PES}_{0.25} + \beta + s$  for the genotypic data. They denote the  
367 PES models with  $r_s = 0.25$  together with the considerations of null alleles (for phenotypes only), negative



368 amplification and self-fertilization. Because the estimations of genotyping error rate  $e$  and sample rate  
369  $p_s$  depend on the number of assigned parents, the performance of a less efficient method will be reduced  
370 again due to the inaccurate estimations of  $e$  and  $p_s$ . Since the aim of our simulation is to evaluate the  
371 performance of four methods, not the influence of the estimations of  $e$  and  $p_s$ , the true values of  $e$  and  $p_s$   
372 are used as the *a priori* information. We perform 2000 Monte-Carlo simulations to obtain various critical  
373 values of the statistic  $\Delta$ , and the correct assignment rates under three critical values (0,  $\Delta_{0.8}$  and  $\Delta_{0.95}$ )  
374 are recorded.

375 For both the DOMINANT and the SIBSHIP methods, the frequency  $p_{\text{dom}}$  of the dominant allele at a  
376 pseudo-dominant marker is estimated by  $\hat{p}_{\text{dom}} = 1 - \sqrt{1 - \hat{p}_{\text{tar}}}$ , where  $\hat{p}_{\text{tar}}$  is the observed probability that  
377 a randomly sampled phenotype contains the target allele. For the DOMINANT method, we implement the  
378 calculations of likelihood formulas listed in Appendix H in our simulation program. We also perform 2000  
379 Monte-Carlo simulations to obtain the thresholds of  $\Delta$ , and record the correct assignment rates under  
380 the same thresholds as above. For the SIBSHIP method, we write the pseudo-dominant phenotypes, the  
381 allele frequency estimates and other necessary parameters into a COLONY V2.0.6.5 input file. To avoid  
382 interference by the other cases, a unique input file for each case is generated. After calling `colony2p.exe`  
383 by a command-line mode, the results can be read from the output files. The probability of the identified  
384 parent(s) is used as a confidence level to compare with the PHENOTYPE and DOMINANT methods. The  
385 EXCLUSION method is implemented in our simulation program. In this method, the alleged parent (or  
386 parent-pair) with the fewest mismatches is assigned. If multiple alleged parents (or parent-pairs) have  
387 the same number of mismatches, none of them is assigned. For this method, any confidence level is  
388 unavailable.

389 For the four applications, each correct assignment rate as a function of  $L$  is denoted by a section of  
390 the overlapped bar charts, shown in Figure 1 for the genotypic data or in Figures 2, S1 and S2 for the  
391 phenotypic data.

392 For the genotypic data, it can be seen from Figure 1 that each correct assignment rate increases as  
393 the number of loci  $L$  also increases, whose values reach a steady state if  $L$  is large enough (e.g.  $L \geq 12$  for  
394 Application (i) or  $L \geq 9$  for the other applications). The correct assignment rate generally reduces as the  
395 ploidy level increases. Moreover, as the selfing rate increases the correct assignment rate also increases  
396 but the difference among different ploidy levels decreases.

397 For the phenotypic data, it can be seen from Figure 2 that the correct assignment rate reduces  
398 as the ploidy level increases. The PHENOTYPE method outperforms the other methods, whose correct  
399 assignment rate at  $L = 9$  is roughly the same as those of the other methods at  $L = 18$ , indicating that  
400 the PHENOTYPE method can reduce the number of loci needed to achieve the same accuracy by 40% to  
401 60%. This method is also less sensitive to changes in the ploidy level, but an additional 23% and 45% loci  
402 are still required to reach the same correct assignment rate in tetraploids and hexaploids, respectively.

403 Compared with the DOMINANT method, the performance of the SIBSHIP method is improved in  
404 Applications (i) and (ii) at a high  $L (\geq 15)$ , but is inferior in the other scenarios. The performance of  
405 the EXCLUSION methods is good in Applications (ii) to (iv) at a high  $L (\geq 15)$  but is inapplicable in  
406 Application (i).

407 It can be seen from Figures S2 and S3 that, like the results of genotypic data, the correct assignment  
408 rate is increased under most situations if the selfing rate is increased from 0 to 0.3. The assignment rate  
409 is reduced in Applications (ii) to (iv) under both the SIBSHIP and the EXCLUSION methods.

## 410 Empirical data

411 We used a microsatellite dataset from the highbush blueberry (*Vaccinium corymbosum*) (Chapter 5,  
412 Huber, 2016) to test the same four methods. The highbush blueberry has tetrasomic inheritance with no  
413 evidence of fixed heterozygosity (that indicates disomic inheritance; Krebs and Hancock, 1989).

414 The blueberry samples were collected from Agriculture Agri-Food Canada blueberry plots in Ab-  
415 botsford and Agassiz, BC., Canada (Huber, 2016). Five controlled crosses, each with 25 to 30 offspring,  
416 were collected, resulting in a collection of 150 individuals, 143 of which were offspring. All samples were  
417 successfully amplified at 15 microsatellite loci, with the number of alleles sampled ranging from three to  
418 ten (Mean  $\pm$  SD is  $5.60 \pm 2.33$ ).

419 Following the four applications for the simulated data, we designed four similar applications for these  
420 empirical data. Application (I) or (II) refers to identifying the father when the mother is either unknown  
421 or known. There are 286 cases for each application, and each case has either 60 alleged fathers (including  
422 the true father and 59 false fathers) for Application (I) or the known mother together with 60 alleged  
423 fathers (including the true father and 59 false fathers) for Application (II). Application (III) refers to  
424 identifying the father and the mother jointly in which the alleged fathers and the alleged mothers are  
425 drawn from two different collections. There are 143 cases for this application, each of which has 30 alleged

426 fathers (including the true father and 29 false fathers) and 30 alleged mothers (including the true mother  
427 and 29 false mothers). Application (IV) refers to identifying the father and the mother jointly in which  
428 the alleged fathers and the alleged mothers are drawn from the same collection. There are also 143 cases  
429 for this application, each of which has 60 alleged parents of unknown sex (including two true parents and  
430 58 false parents).

431 There are altogether seven parents in these five controlled crosses. To increase the difficulty of our  
432 analysis, we also add 120 false parents which are generated by randomly copying the phenotypes from the  
433 real individuals. We randomly sample five to 15 loci from the dataset. For each value of  $L$ , 100 datasets  
434 are generated, each including 150 true individuals and 120 false parents. These datasets will be used to  
435 perform our parentage analysis by using the same four methods as described in the previous section. The  
436 analytical procedures are also the same as in the previous section except that the number of Monte-Carlo  
437 simulations to obtain the thresholds of  $\Delta$  is 10,000 instead of 2000. The correct assignment rate will be  
438 used to measure the accuracy of each model.

439 The parentage assignment results from using each of the four methods and applying the phenotypic  
440 dataset of Huber (2016) are shown in Figure 3. The results patterns are similar to those obtained from  
441 the simulated data. The PHENOTYPE method still outperforms the other three methods but to a lesser  
442 degree than when the simulated dataset was used, but the PHENOTYPE method can still achieve the  
443 same accuracy with only 75% of the loci needed for the other methods. The EXCLUSION method is still  
444 inaccurate and cannot be applied to real data in Application (I), but its performance is relatively good  
445 for the other applications when  $L > 10$ . The DOMINANT method performs worse than the other three  
446 methods for Application (IV), as does the SIBSHIP method for Application (I).

## 447 **Evaluation of genotyping error rate and sample rate**

448 We use the simulated data to evaluate the performances of both estimators for the genotyping error  
449 rate and the sample rate. The same four applications are used as previously described, and are still  
450 referred to as Applications (i) to (iv). We estimate the genotyping error rate and the sample rate for each  
451 application. Two pairs of sampling and genotyping conditions, *poor* and *good*, are selected, which are  
452  $e = 0.1$  and  $p_s = 0.5$  for poor, or  $e = 0.02$  and  $p_s = 0.8$  for good. The remaining parameters are almost  
453 the same as those in the section *Simulated data*, in which  $s = 0.1$ ,  $p_y = 0.1$  and  $L$  is taken from six to 24  
454 at an interval of three. We then perform 100 simulations for each configuration. The PHENOTYPE method

455 is used to perform the parentage analysis with *a priori* genotyping error rate  $e = 0.01$  and sample rate  
456  $p_s = 0.9$ . The allele frequencies are estimated under the  $PES_{0.25} + p_y + \beta + s$  model. The performances  
457 of both estimators are evaluated by the RMSE.

458 For the estimation of the genotyping error rate, the identified pairs (or trios) with a confidence level  
459 of 99% are considered as the reference pairs (or trios), with  $\delta$  estimated by randomly sampling 10,000  
460 pairs (or trios). In Application (i),  $\hat{e}$  is estimated from the pair mismatch, whilst for the remaining  
461 applications  $\hat{e}$  is estimated from the pair or the trio mismatches.

462 For the estimation of sample rate, we use the weighted average of  $\hat{p}_s$  across three confidence levels  
463 (80%, 95% and 99%) for each application. Because  $\hat{a}_c$  and  $\hat{a}_u$  are obtained from the simulation, they may  
464 be influenced by any inaccurate simulation parameters, such as the sample rate, the selfing rate and the  
465 genotyping error rate. To improve the accuracy of these simulation parameters, we perform two rounds  
466 of analyses. The estimated sample rate and genotyping error rate in the first round are used as the *a*  
467 *priori* values in the second round. The results of the second round are used to evaluate the performance.

468 The results under both poor and good conditions are shown in Figures 4 and S4, respectively. For  
469 the estimation of the genotyping error rate, it can be seen that the results are good due to the RMSE  
470 being reduced to a low level. For example, the RMSE at  $L = 24$  is able to reach 0.02 in poor conditions or  
471 0.005 in good conditions. The RMSE for Application (i) performs worse than for the other applications,  
472 and increases greatly as the ploidy level also increases. This is because only the pair mismatch can be  
473 used for this application, and the single-locus exclusion rate for the first category is small. The RMSE  
474 for Application (ii) performs better than for the other applications, because both the pair and the trio  
475 mismatches are used for this application, and the single-locus exclusion rate for the second category is  
476 usually higher than the other applications. The RMSE curves of Applications (iii) and (iv) are similar.

477 For the estimation of the sample rate, Figures 4 and S4 show that the results are inferior to those for  
478 the estimation of the genotyping error rate. For example, the RMSE at  $L = 24$  is only able to reach 0.05  
479 in poor conditions or 0.02 in good conditions. Unlike the estimation of the genotyping error rate, the  
480 results for Application (i) are not obviously inferior to those for the other applications. This is because  
481 the assignment rate rather than the reference pairs is used to estimate the sample rate, causing the results  
482 influenced less by the low single-locus exclusion rate.

483 The results for Application (ii) are poorer than those for estimating the genotyping error rate because

484 fewer cases ( $\approx 50$  cases) are used (about half of the true mothers are not sampled). If Applications (i)  
485 and (ii) use the same number of cases, then the performance of Application (ii) would be better than  
486 Application (i). Because Application (ii) also uses the mother's data, which can better distinguish the  
487 true and the false fathers, the difference between  $a_c$  and  $a_u$  in Application (ii) is larger than that in  
488 Application (i) under the same conditions (e.g. Figure S3).

489 The results for Application (iii) are usually better than those for the other applications. This is  
490 because Application (iii) does not need to estimate the selfing rate and has a larger sample size (100  
491 cases). However, the selfing rate has to be estimated for Application (iv), and thus the results are less  
492 accurate than for Application (iii).

## 493 Discussion

### 494 Inheritance model

495 Meiosis in polyploids is complex. Disomic and polysomic inheritances are two extremes, and many  
496 autopolyploid taxa represent the intermediate stages (Butruille and Boiteux, 2000). Allopolyploids (such  
497 as the segmental allopolyploids) can also display intermediate inheritance at some loci (Stift *et al.*, 2008).  
498 In addition, some autopolyploid species can also form bivalent, univalent and other types of valents during  
499 meiosis (Lloyd and Bomblies, 2016). The formation of different types of valents may influence the sterility  
500 of the gametes or the seeds (Solís Neffa and Fernández, 2000)

501 For the autopolyploids with pure disomic inheritance, we can adopt the RCS model to simulate  
502 disomic inheritance. This is because the genotypic frequencies, gamete frequencies and transitional prob-  
503 abilities in the RCS model are the same as those for disomic inheritance. These probabilities are of  
504 interest for parentage analysis. The difference between the RCS model and disomic inheritance is that  
505 100% multivalent formation is assumed in the former, whilst 100% bivalent formation is assumed in  
506 the latter. For the allopolyploids with pure disomic inheritance, all diploid methods including those of  
507 parentage analysis can be used if the genotypes at different isoloci are identified.

508 For intermediate inheritance, e.g. 50% bivalent and 50% multivalent gamete formation, regardless  
509 of how complex the nature of meiosis, identical-by-double-reduction (IBDR) alleles will be present in  
510 the resulting fertile gametes (Huang *et al.*, 2019). For this reason, a generalized model was proposed,  
511 which uses  $\lfloor v/4 \rfloor$  double-reduction rates in the calculation of genotypic frequencies and is able to describe

512 meiosis patterns including that for intermediate inheritance (Huang *et al.*, 2019). However, this model  
513 is too complex because it has  $\lfloor v/4 \rfloor$  more degrees of freedom than the RCS (PRCS or CES) model. It is  
514 difficult to accurately estimate each double-reduction rate and thus is unrealistic to apply to many actual  
515 conditions. Even if these double-reduction rates are estimated, this model will often be suboptimal to  
516 other models because of the requirement for more degrees-of-freedom to explain various trends in a data  
517 set resulting in a higher BIC.

518 To better approximate the natural patterns, a simplified version of the generalized model was de-  
519 veloped, named the PES model, which accommodates the single chromatid recombination rate  $r_s$  as an  
520 additional parameter to calculate the genotypic frequencies (Huang *et al.*, 2019). Especially, this model  
521 is equivalent to either the RCS model if  $r_s = 0$ , or the CES model if  $r_s = 1$ . Our software provides three  
522 PES-related models, which are the PES<sub>0.25</sub>, the PES<sub>0.5</sub> and the PES estimate  $r_s$ . The former two models  
523 do not increase their degrees-of-freedom because they use a fixed value of  $r_s$ . We suggest to evaluate  
524 candidate models by the BIC and chose the optimal model with the lowest BIC (as in Huang *et al.*, 2020).

## 525 Performance of parentage analysis

526 For the genotypic data, the results for polyploids are generally similar to those for diploids (Figure  
527 1). The correct assignment rate tends to increase if the ploidy level ranges from two to four, whilst  
528 the assignment rate decreases with a ploidy level that ranges from four to ten. However, this trend is  
529 weakened as the selfing rate increases.

530 These phenomena have at least three not necessarily mutually exclusive explanations. (i) At a high  
531 polyploid level, a genotype has more allele copies and so contains more genetic information (Huang *et al.*,  
532 2014). This can improve the performance of parentage analysis and many other population genetics anal-  
533 yses (e.g. the estimation of allele frequencies, genetic diversity,  $F$ -statistics, and relatedness coefficients).  
534 (ii) At a high polyploid level, the false parents are more likely to share the same alleles with the offspring,  
535 which may reduce the correct assignment rate. For example, if the ploidy level is high, reaching 1000,  
536 the false parents will share the same alleles with the offspring at a hexa-allelic locus. This is similar to  
537 when biallelic loci are used in tetraploids or hexaploids, the details of which are discussed in the following  
538 section. (iii) Selfing is able to reduce the difference among ploidy levels and improve the performance of  
539 our parentage analysis. Each of these three explanations will also be reflected in the phenotype results  
540 and are described at the end of this section.

541 For the phenotypic data, the results for polyploids are generally inferior to those for diploids for each  
542 application and for each method (e.g. see Figure 2). The PHENOTYPE method performs best among all  
543 four methods, saving at least 25% more loci than the other methods (e.g. see Figures 2 and 3), whose  
544 performances are stable for all applications.

545 For the four applications, the results of the PHENOTYPE method for diploids (Figures 2, S2 and S3)  
546 are slightly inferior to those for the genotypic data (Figure 1). This is because null alleles are simulated  
547 for the phenotypic data. In the absence of null alleles, each phenotype is only determined by one genotype  
548 for diploids. Therefore, both results under such condition are identical (data not shown).

549 For the DOMINANT (Rodzen *et al.*, 2004) and SIBSHIP (Wang and Scribner, 2014) methods, the results  
550 are suboptimal to those of the PHENOTYPE method (e.g. see Figures 3 and S2). In both the dominant and  
551 sibship methods, the polyploid codominant phenotypic data are transformed into the pseudo-dominant  
552 data, and the diploid procedures for a parentage analysis are subsequently used to perform an analysis.  
553 During transformation, genetic information is lost (Wang and Scribner, 2014) and some noise is also  
554 introduced. For example, in the pseudo-dominant approach the pseudo-dominant loci are assumed to  
555 be unlinked. In fact, because there are at most  $v$  alleles in a phenotype, the presence of an allele in a  
556 phenotype will reduce the probability of observing the other alleles in this phenotype, and so these loci are  
557 negatively correlated rather than unlinked. In addition, for the pseudo-dominant approach, many factors  
558 that affect the parentage analysis are not considered, such as double-reduction, null alleles, negative  
559 amplification, and inbreeding/selfing.

560 The EXCLUSION method (Zwart *et al.*, 2016) performs well in Applications (ii) to (iv), and the results  
561 are better than those for both the DOMINANT and the SIBSHIP methods but only if  $L$  is high (e.g. see  
562 Figures 3 and S3). However, the EXCLUSION method cannot be used for Application (i) because the  
563 single-locus exclusion rate in the first category is too low (e.g. 0.01 for hexaploid phenotypes at a hexa-  
564 allelic locus). Therefore, hundreds of loci are needed in order to exclude the false parents. This feature  
565 also influences the estimation of the genotyping error rate, such that the RMSE for Application (i) is  
566 highest (Figure 4).

567 From our simulation results, self-fertilization improves the accuracy of a parentage analysis, and  
568 reduces the variation of accuracies among different ploidy levels (Figures 1, 2, S2 and S3). This is  
569 because the genotypes become more homozygous as the selfing rate increases. If the selfing rate is one,

570 all genotypes will become homozygotes at an equilibrium state. In such a case, each individual can be  
571 regarded as a haploid, and the ploidy level will not affect the accuracy of a parentage analysis.

## 572 Genotyping error rate and sample rate

573 Our estimator for the genotyping error rate  $e$  is asymptotically unbiased as the number of loci  
574 increases. The bias of  $\hat{e}$  is from the estimation of  $\gamma$ . Because  $\gamma$  is estimated from any mismatches in the  
575 reference pairs or trios that are extracted from the identified parent(s), the confidence level of the true  
576 parents with few mismatches are successfully identified at a high probability. As a result, the value of  $\hat{\gamma}$   
577 may be underestimated.

578 The estimation of the genotyping error rate does not use any simulation ( $\gamma$  is estimated from the  
579 reference pairs or trios, and  $\delta$  is estimated from the distribution of the observed genotypes/phenotypes).  
580 This means that the estimator is not only robust but also insensitive to any errors in the simulation  
581 parameters (such as the allele frequency, negative amplification rate, selfing rate, sample rate, or the  
582 genotyping error rate). Any errors in these simulation parameters can only slightly affect the identified  
583 parents, which will not significantly affect the accuracy of  $\hat{e}$ . However, this estimator needs sufficient loci  
584 to identify the reference pairs or trios. For instance, if  $e = 0.1$  and  $p_s = 0.5$ , at least 15 loci are required  
585 in order to estimate the genotyping error rate for hexaploids in Application (i) (Figure 4).

586 Compared with the genotyping error rate, the estimation of the sample rate  $p_s$  is less accurate and  
587 more sensitive to errors in the simulation parameters. There are at least three not necessarily mutually  
588 independent explanations for these patterns. (i) The estimate of the genotyping error rate is the weighted  
589 average of single-locus estimated values across all loci, where the actual sample size is  $\sum_l n_{rl}$ . Whilst  
590 the sample rate is estimated only once for all loci, the actual sample size is the number of cases  $n_c$  (see  
591 Appendix G). (ii) The sample rate estimator is biased in all categories in a parentage analysis because  $\hat{p}_s$   
592 is truncated into the range  $[0, 1]$  and the operation of the square root is used in the third category. (iii)  
593 The simulation is used to obtain  $\hat{a}_c$  and  $\hat{a}_u$  for the estimation of the sample rate, whilst the parameters  
594 used for simulation may be inaccurate (e.g. *a priori*  $e$  and  $p_s$ ). Any errors in  $\hat{a}_c$  and  $\hat{a}_u$  can be passed  
595 to  $\hat{p}_s$ , but such errors can be eliminated by increasing the number of loci. When the number of loci are  
596 sufficient,  $\hat{a}_c$  will be close to one, and  $\hat{a}_u$  to zero. We suggest that users perform two rounds of estimation  
597 so as to reduce such errors as we have in the evaluation above.



## 598 Polymorphism of loci

599 Because polyploids have more allele copies in a genotype, the false parents are more likely to share  
600 the same alleles with the offspring. Therefore, data resulting from the use of biallelic markers, e.g. *single*  
601 *nucleotide polymorphism* (SNPs), are unsuitable for performing a polyploid parentage analysis.

602 We will illustrate this by using the exclusion approach for the first category. For a given alleged  
603 parent, if its phenotype  $\mathcal{P}_A$  does not share any allele with its offspring phenotype  $\mathcal{P}_O$ , then it can be  
604 excluded as a true parent. If we assume that the double-reduction model is the RCS model, and that  
605 there are no interference factors (such as genotyping errors, self-fertilization, null alleles or negative  
606 amplification), then the exclusion rate  $\text{Excl}_1$  at a biallelic locus for the first category is

$$\text{Excl}_1 = \Pr(\mathcal{P}_O = A, \mathcal{P}_A = B) + \Pr(\mathcal{P}_O = B, \mathcal{P}_A = A) = 0.5^{2v-1},$$

607 where  $A$  and  $B$  are the two alleles at this locus. The values of  $\text{Excl}_1$  from disomic to decasomic inher-  
608 itances are in turn  $0.125$ ,  $7.813 \times 10^{-3}$ ,  $4.883 \times 10^{-4}$ ,  $3.052 \times 10^{-5}$  and  $1.907 \times 10^{-6}$ . This sequence  
609 decreases exponentially, indicating that the false parents become less likely to be excluded as the ploidy  
610 level increases. Moreover, the number of loci required to achieve the combined exclusion rate  $0.95$  is  
611  $\ln(0.05)/\ln(1 - \text{Excl}_1)$ , whose values from disomic to decasomic inheritances are in turn  $22$ ,  $382$ ,  $6134$ ,  
612  $98163$  and  $1570625$ .

613 Although next-generation sequencing (NGS) is able to segregate millions of SNPs, two reasons make  
614 it difficult to directly perform a parentage analysis with data obtained by using SNPs. First, the allele  
615 frequencies of most SNPs are not uniform, which reduces the exclusion rate. Second, adjacent SNPs are  
616 closely linked. This will reduce the accuracy of results because the genetic markers are assumed to be  
617 unlinked in all parentage analysis models.

618 Fortunately, haplotype assembly (Aguiar and Istrail, 2013), phased sequencing (Yang *et al.*, 2011;  
619 Manching *et al.*, 2017) and haplotype inference (Neigenfind *et al.*, 2008) can all help to maintain the  
620 efficiency of NGS data, and can segregate multi-allelic loci by combining the closely linked variants so  
621 as to increase the single-locus polymorphism. Additionally, polyploid genotype calling can directly call  
622 back the genotypes but can currently only be applied to the biallelic variants (Carley *et al.*, 2017; Weiß  
623 *et al.*, 2018).

624 Multi-allelic markers can also be influenced by the same problem. We perform a simple simulation

625 to describe the influence of the number of amplifiable alleles on the correct assignment rate, in which  
626 20 loci with uniform amplifiable allele frequencies are used to perform our parentage analysis under  
627 the PHENOTYPE method (Figure 5). The correct assignment rate is much increased if the number of  
628 amplifiable alleles equates broadly to the ploidy level  $v$ , indicating that to achieve the optimal result, the  
629 number of amplifiable alleles should be greater than or equal to  $v$  (Figure 5). More loci are required if  
630 loci with relatively low levels of polymorphism are used. We suggest therefore to use highly polymorphic  
631 loci to perform parentage analysis.

## 632 Optimization and complexity

633 We use multi-threading, dynamic programming and genotype/phenotype indexing to optimize com-  
634 putational speed. The dynamic programming stores the likelihoods or LODs into a table so as to avoid  
635 repeated calculations. The genotype/phenotype indexing only records the hash values of genotypes /phe-  
636 notypes for each individual, and the information of genotypes/phenotypes are saved in a hash table, that  
637 also includes the alleles, various frequencies (or prior/posterior probabilities), possible gametes and the  
638 number of occurrences.

639 All of these simulations took a total of three weeks to compute using a powerful workstation (Xeon  
640 E5 2699V4 36 cores). Computing efficiency will also be affected by the ploidy level  $v$  and the number  
641 of alleles  $K$  due to four main reasons: (i) the number of phenotypes increases as  $v$  and  $K$  increase,  
642 which reduces the efficiency of dynamic programming because more memory is required to store the  
643 likelihoods or LODs; (ii) the average number of genotypes determining a phenotype increases as  $v$  and  
644  $K$  increase, which decelerates the calculation of likelihoods or LODs; (iii) the average number of gametes  
645 produced by a zygote increases as  $v$  and  $K$  increase, which decelerates the calculation of  $T(G_O | G_F)$   
646 and  $T(G_O | G_F, G_M)$  in Equation (A6); (iv) the number of terms in Equation (A7) increases as  $v$  and  $K$   
647 increase, which decelerates the calculation of  $T(g | G)$  in Equation (A7). These four factors collectively  
648 and multiplicatively increase the complexity of the calculations. It is therefore not possible to perform  
649 an extensive simulation for highly polymorphic loci (e.g.  $K > 7$ ) or for high ploidy levels (e.g.  $v = 8$  or  
650  $v = 10$ ).

## 651 Acknowledgements

652 We would like to thank the subject editor and two anonymous reviewers for their suggestions and  
653 comments. This study is funded by the Strategic Priority Research Program of the Chinese Academy of  
654 Sciences (XDB31020302), the National Natural Science Foundation of China (31730104, 31770411 and  
655 31572278), the Young Elite Scientists Sponsorship Program by CAST (2017QNRC001), the National Key  
656 Programme of Research and Development, Ministry of Science and Technology (2016YFC0503200), and  
657 the Shaanxi Science and Technology Innovation Team (2019TD-012). Derek W. Dunn is supported by  
658 Shaanxi Province Talents 100 Fellowship.

## 659 LITERATURE CITED

- 660 Aguiar, D., and S. Istrail, 2013 Haplotype assembly in polyploid genomes and identical by descent  
661 shared tracts. *Bioinformatics* 29: i352–i360.
- 662 Barker, M. S., N. Arrigo, A. E. Baniaga, Z. Li, and D. A. Levin, 2016 On the relative abundance of  
663 autopolyploids and allopolyploids. *New Phytologist* 210: 391–398.
- 664 Bezemer, N., S. Krauss, R. Phillips, D. Roberts, and S. Hopper, 2016 Paternity analysis reveals wide  
665 pollen dispersal and high multiple paternity in a small isolated population of the bird-pollinated  
666 *Eucalyptus caesia* (Myrtaceae). *Heredity* 117: 460–471.
- 667 Blouin, M. S., 2003 DNA-based methods for pedigree reconstruction and kinship analysis in natural  
668 populations. *Trends in Ecology & Evolution* 18: 503–511.
- 669 Butruille, D., and L. Boiteux, 2000 Selection-mutation balance in polysomic tetraploids: impact of  
670 double reduction and gametophytic selection on the frequency and subchromosomal localization of  
671 deleterious mutations. *Proceedings of the National Academy of Sciences* 97: 6608–6613.
- 672 Carley, C. A. S., J. J. Coombs, D. S. Douches, P. C. Bethke, J. P. Palta *et al.*, 2017 Automated tetraploid  
673 genotype calling by hierarchical clustering. *Theoretical and Applied Genetics* 130: 717–726.
- 674 Darlington, C. D., 1929 Chromosome behaviour and structural hybridity in the Tradescantiae. *Journal*  
675 *of Genetics* 21: 207–286.

- 676 Dempster, A. P., N. M. Laird, D. B. Rubin *et al.*, 1977 Maximum likelihood from incomplete data via  
677 the EM algorithm. *Journal of the Royal Statistical Society* 39: 1–38.
- 678 Duminil, J., K. Daïnou, D. K. Kaviriri, P. Gillet, J. Loo *et al.*, 2016 Relationships between population  
679 density, fine-scale genetic structure, mating system and pollen dispersal in a timber tree from African  
680 rainforests. *Heredity* 116: 295–303.
- 681 Field, D. L., L. M. Broadhurst, C. P. Elliott, and A. G. Young, 2017 Population assignment in au-  
682 topolyploids. *Heredity* 119: 389–401.
- 683 Fisher, R. A., 1943 Allowance for double reduction in the calculation of genotype frequencies with  
684 polysomic inheritance. *Annals of Human Genetics* 12: 169–171.
- 685 Fisher, R. A., and K. Mather, 1943 The inheritance of style length in *Lythrum salicaria*. *Annals of*  
686 *Eugenics* 12: 1–23.
- 687 Geiringer, H., 1949 Chromatid segregation of tetraploids and hexaploids. *Genetics* 34: 665–684.
- 688 Gerber, S., S. Mariette, R. Streiff, C. Bodenes, and A. Kremer, 2000 Comparison of microsatellites  
689 and amplified fragment length polymorphism markers for parentage analysis. *Molecular Ecology* 9:  
690 1037–1048.
- 691 Haldane, J. B. S., 1930 Theoretical genetics of autopolyploids. *Journal of Genetics* 22: 359–372.
- 692 Huang, K., D. W. Dunn, K. Ritland, and B. Li, 2020 POLYGENE: Population genetics analyses for  
693 autopolyploids based on allelic phenotypes. *Methods in Ecology and Evolution* 11: 448–456.
- 694 Huang, K., K. Ritland, S. T. Guo, M. Shattuck, and B. G. Li, 2014 A pairwise relatedness estimator  
695 for polyploids. *Molecular Ecology Resources* 14: 734–744.
- 696 Huang, K., T. C. Wang, D. W. Dunn, P. Zhang, R. C. Liu *et al.*, 2019 Genotypic frequencies at  
697 equilibrium for polysomic inheritance under double-reduction. *G3: Genes, Genomes, Genetics* 9: 1693–  
698 1706.
- 699 Huber, G., 2016 *An investigation of highbush blueberry floral biology and reproductive success in British*  
700 *Columbia*, Ph.D. thesis, University of British Columbia.

- 701 Ismail, S. A., J. Ghazoul, G. Ravikanth, C. G. Kushalappa, R. Uma Shaanker *et al.*, 2017 Evaluating  
702 realized seed dispersal across fragmented tropical landscapes: a two-fold approach using parentage  
703 analysis and the neighbourhood model. *New Phytologist* 214: 1307–1316.
- 704 Kalinowski, S. T., and M. L. Taper, 2006 Maximum likelihood estimation of the frequency of null alleles  
705 at microsatellite loci. *Conservation Genetics* 7: 991–995.
- 706 Kalinowski, S. T., M. L. Taper, and T. C. Marshall, 2007 Revising how the computer program CERVUS  
707 accommodates genotyping error increases success in paternity assignment. *Molecular Ecology* 16: 1099–  
708 1106.
- 709 Krebs, S. L., and J. F. Hancock, 1989 Tetrasomic inheritance of isoenzyme markers in the highbush  
710 blueberry, *Vaccinium corymbosum* L. *Heredity* 63: 11–18.
- 711 Lloyd, A., and K. Bomblies, 2016 Meiosis in autopolyploid and allopolyploid *Arabidopsis*. *Current*  
712 *Opinion in Plant Biology* 30: 116–122.
- 713 Manching, H., S. Sengupta, K. R. Hopper, S. W. Polson, Y. Ji *et al.*, 2017 Phased genotyping-by-  
714 sequencing enhances analysis of genetic diversity and reveals divergent copy number variants in maize.  
715 *G3: Genes, Genomes, Genetics* 7: 2161–2170.
- 716 Marshall, T. C., J. Slate, L. E. B. Kruuk, and J. M. Pemberton, 1998 Statistical confidence for likelihood-  
717 based paternity inference in natural populations. *Molecular Ecology* 7: 639–655.
- 718 Mather, K., 1935 Reductional and equational separation of the chromosomes in bivalents and multiva-  
719 lents. *Journal of Genetics* 30: 53–78.
- 720 Monthe, F. K., O. J. Hardy, J.-L. Doucet, J. Loo, and J. Duminil, 2017 Extensive seed and pollen  
721 dispersal and assortative mating in the rain forest tree *Entandrophragma cylindricum* (Meliaceae)  
722 inferred from indirect and direct analyses. *Molecular Ecology* 26: 5279–5291.
- 723 Muller, H. J., 1914 A new mode of segregation in gregory’s tetraploid *Primulas*. *The American Natu-*  
724 *ralist* 48: 508–512.
- 725 Neigenfind, J., G. Gyetvai, R. Basekow, S. Diehl, U. Achenbach *et al.*, 2008 Haplotype inference from  
726 unphased SNP data in heterozygous polyploids based on SAT. *BMC Genomics* 9: 356.

- 727 Nelder, J. A., and R. Mead, 1965 A simplex method for function minimization. *The Computer Journal*  
728 7: 308–313.
- 729 Norman, P., A. Asfaw, P. Tongoona, A. Danquah, E. Danquah *et al.*, 2018 Can parentage analysis  
730 facilitate breeding activities in root and tuber crops? *Agriculture* 8: 95.
- 731 Oddou-Muratorio, S., J. Gauzere, A. Bontemps, J.-F. Rey, and E. K. Klein, 2018 Tree, sex and size:  
732 Ecological determinants of male versus female fecundity in three *Fagus sylvatica* stands. *Molecular*  
733 *Ecology* 27: 3131–3145.
- 734 Parisod, C., R. Holderegger, and C. Brochmann, 2010 Evolutionary consequences of autopolyploidy.  
735 *New Phytologist* 186: 5–17.
- 736 Pelé, A., M. Rousseau-Guétin, and A.-M. Chèvre, 2018 Speciation success of polyploid plants closely  
737 relates to the regulation of meiotic recombination. *Frontiers in Plant Science* 9: 907.
- 738 Pritchard, J. K., M. Stephens, and P. Donnelly, 2000 Inference of population structure using multilocus  
739 genotype data. *Genetics* 155: 945–959.
- 740 Ravinet, M., A. Westram, K. Johannesson, R. Butlin, C. André *et al.*, 2016 Shared and nonshared  
741 genomic divergence in parallel ecotypes of *Littorina saxatilis* at a local scale. *Molecular Ecology* 25:  
742 287–305.
- 743 Ritland, K., 2002 Extensions of models for the estimation of mating systems using  $n$  independent loci.  
744 *Heredity* 88: 221–228.
- 745 Rodzen, J. A., T. R. Famula, and B. May, 2004 Estimation of parentage and relatedness in the poly-  
746 ploid white sturgeon (*Acipenser transmontanus*) using a dominant marker approach for duplicated  
747 microsatellite loci. *Aquaculture* 232: 165–182.
- 748 Solís Neffa, V., and A. Fernández, 2000 Chromosome studies in *Turnera* (turneraceae). *Genetics and*  
749 *Molecular Biology* 23: 925–930.
- 750 Stift, M., C. Berenos, P. Kuperus, and P. H. van Tienderen, 2008 Segregation models for disomic,  
751 tetrasomic and intermediate inheritance in tetraploids: a general procedure applied to rorippa (yellow  
752 cress) microsatellite data. *Genetics* 179: 2113–2123.

- 753 Stift, M., R. Reeve, and P. Van Tienderen, 2010 Inheritance in tetraploid yeast revisited: segregation  
754 patterns and statistical power under different inheritance models. *Journal of Evolutionary Biology* 23:  
755 1570–1578.
- 756 Tambarussi, E. V., D. Boshier, R. Vencovsky, M. L. Freitas, and A. M. Sebbenn, 2015 Paternity analysis  
757 reveals significant isolation and near neighbor pollen dispersal in small *Cariniana legalis* Mart. Kuntze  
758 populations in the Brazilian Atlantic Forest. *Ecology and Evolution* 5: 5588–5600.
- 759 Tan, L. Q., Q. L. Liu, B. Zhou, C.-J. Yang, X. Zou *et al.*, 2019 Paternity analysis using SSR markers  
760 reveals that the anthocyanin-rich tea cultivar ‘Ziyan’ is self-compatible. *Scientia Horticulturae* 245:  
761 258–262.
- 762 Wagner, A. P., S. Creel, and S. T. Kalinowski, 2006 Estimating relatedness and relationships using  
763 microsatellite loci with null alleles. *Heredity* 97: 336–345.
- 764 Wang, J., and K. T. Scribner, 2014 Parentage and sibship inference from markers in polyploids. *Molec-*  
765 *ular Ecology Resources* 14: 541–553.
- 766 Wang, J. L., 2016 Individual identification from genetic marker data: developments and accuracy com-  
767 parisons of methods. *Molecular Ecology Resources* 16: 163–175.
- 768 Watanabe, S., K.-I. Takakura, Y. Kaneko, N. Noma, and T. Nishida, 2018 Skewed male reproductive  
769 success and pollen transfer in a small fragmented population of the heterodichogamous tree *Machilus*  
770 *thunbergii*. *Journal of Plant Research* 131: 623–631.
- 771 Weiß, C. L., M. Pais, L. M. Cano, S. Kamoun, and H. A. Burbano, 2018 NQUIRE: a statistical framework  
772 for ploidy estimation using next generation sequencing. *BMC Bioinformatics* 19: 122.
- 773 Wood, T. E., N. Takebayashi, M. S. Barker, I. Mayrose, P. B. Greenspoon *et al.*, 2009 The frequency of  
774 polyploid speciation in vascular plants. *Proceedings of the National Academy of Sciences* 106: 13875–  
775 13879.
- 776 Yang, H., X. Chen, and W. H. Wong, 2011 Completely phased genome sequencing through chromosome  
777 sorting. *Proceedings of the National Academy of Sciences* 108: 12–17.

778 Zwart, A. B., C. Elliott, T. Hopley, D. Lovell, and A. Young, 2016 Polypatex: an r package for paternity  
779 exclusion in autopolyploids. *Molecular Ecology Resources* 16: 694–700.

## 780 Author Contributions

781 KR and BGL designed the project, KH and KR constructed the model, GH provided the data, KH  
782 wrote the draft, GH and DD edited the manuscript.

## 783 Figure Legends

784 **Figure 1.** The correct assignment rate as a function of the number of loci  $L$  by using the genotypic  
785 data. Each row is designated an application and each column shows the simulation results for a different  
786 rate of selfing. Every correct assignment rate is denoted by a section of overlapping bar charts. The results  
787 of disomic to decasomic inheritances are shown by red, green, blue, yellow and azure bars, respectively.  
788 The bars with light, medium and bright colors denote in turn the correct assignment rates with the  
789 thresholds 0,  $\Delta_{0.80}$  and  $\Delta_{0.95}$ .

790 **Figure 2.** The correct assignment rates as a function of the number of loci  $L$  by using the phenotypic  
791 data at a selfing rate of 0.1. Each row is designated an application and each column shows the simulation  
792 results for a different ploidy level. The results for the PHENOTYPE, DOMINANT, SIBSHIP and EXCLUSION  
793 methods are shown by the red, green, blue and gray bars, respectively. The bars with light, medium and  
794 bright colors denote in turn the correct assignment rates with the confidence levels 0, 80% and 95%.

795 **Figure 3.** The correct assignment rates as a function of the number of loci  $L$  by using the phenotypic  
796 dataset of Huber (2016). Each row denotes an application. The methods, confidence levels and the  
797 definitions of bars together with their shading are as for Figure 2.

798 **Figure 4.** The RMSE of the estimated genotyping error rate  $\hat{e}$  or the estimated sample rate  $\hat{p}_s$  as  
799 a function of the number of loci  $L$  at  $e = 0.1$  and  $p_s = 0.5$ . Each column shows the results for a different  
800 ploidy level. The curves with circular, rhombic, triangular and squared markers denote the results for  
801 Applications (i), (ii), (iii) and (iv), respectively.

802 **Figure 5.** The correct assignment rates as a function of the number of amplifiable alleles under  
803 the PHENOTYPE method. Twenty loci with uniform allele frequencies of amplifiable alleles are used. The  
804 threshold and the selfing rate are set as  $\Delta_{0.95}$  and 0.1, respectively. The remaining parameters and



805 configurations are as for the simulated dataset. Each column shows the results for either tetrasomic or  
806 hexasomic inheritance. Each curve denotes the result for an application, whose definitions are as for  
807 Figure 4.

808 **Figures**

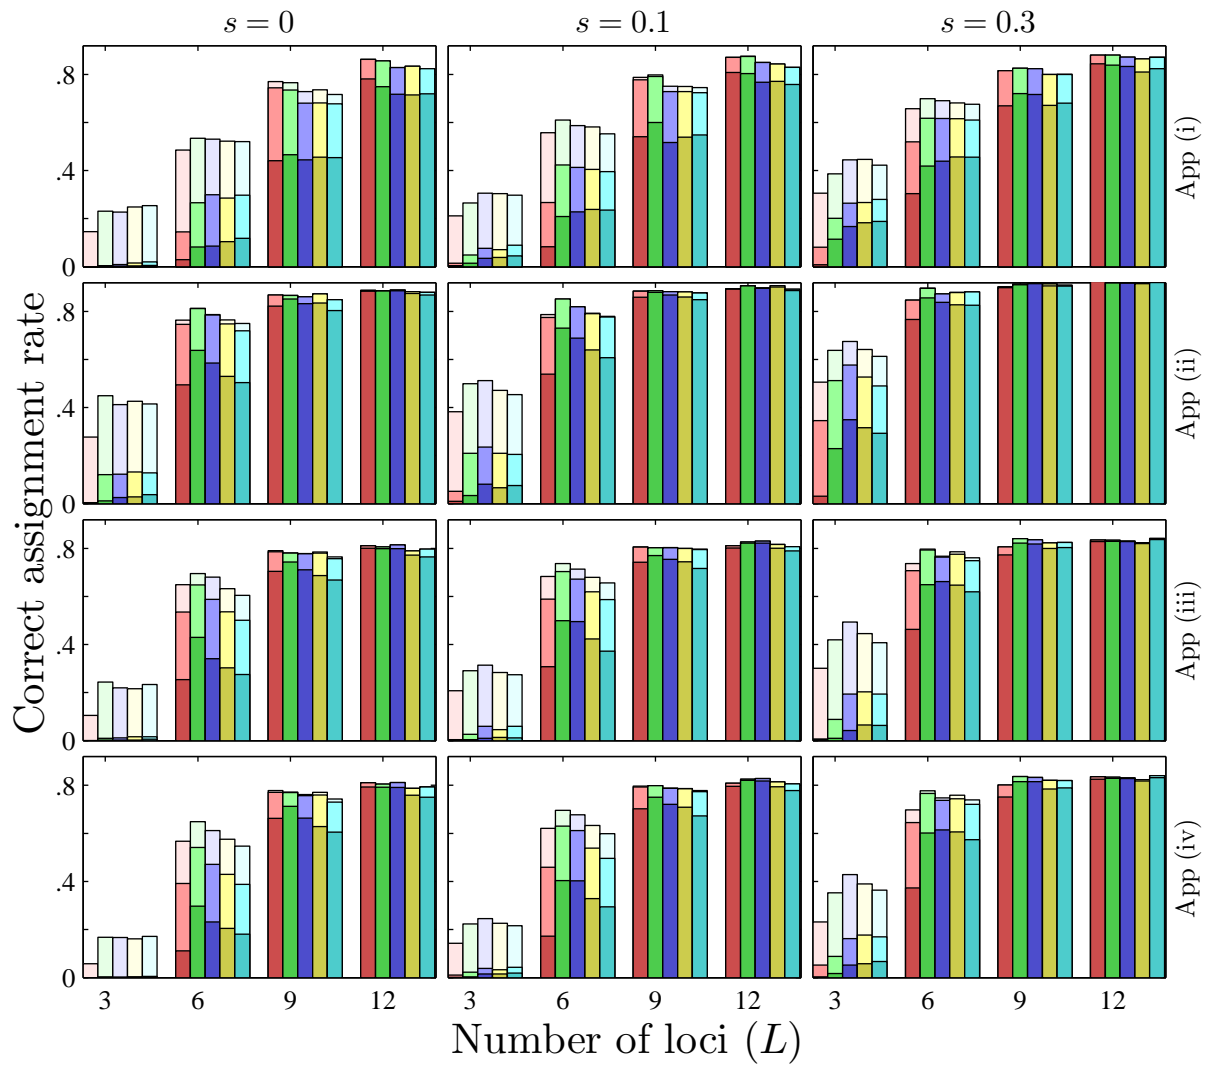

Figure 1:

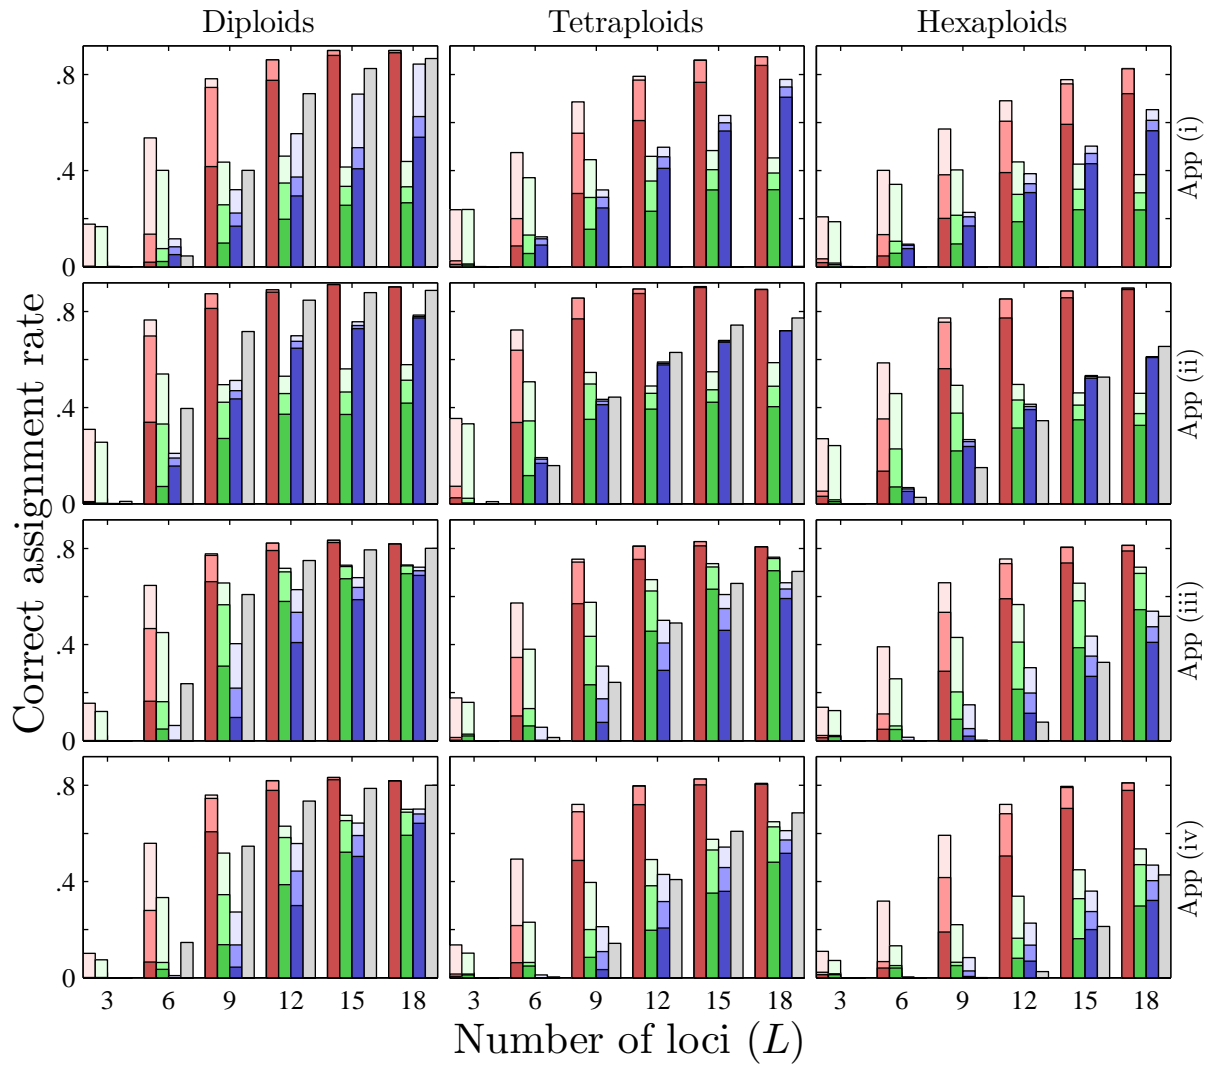

Figure 2:

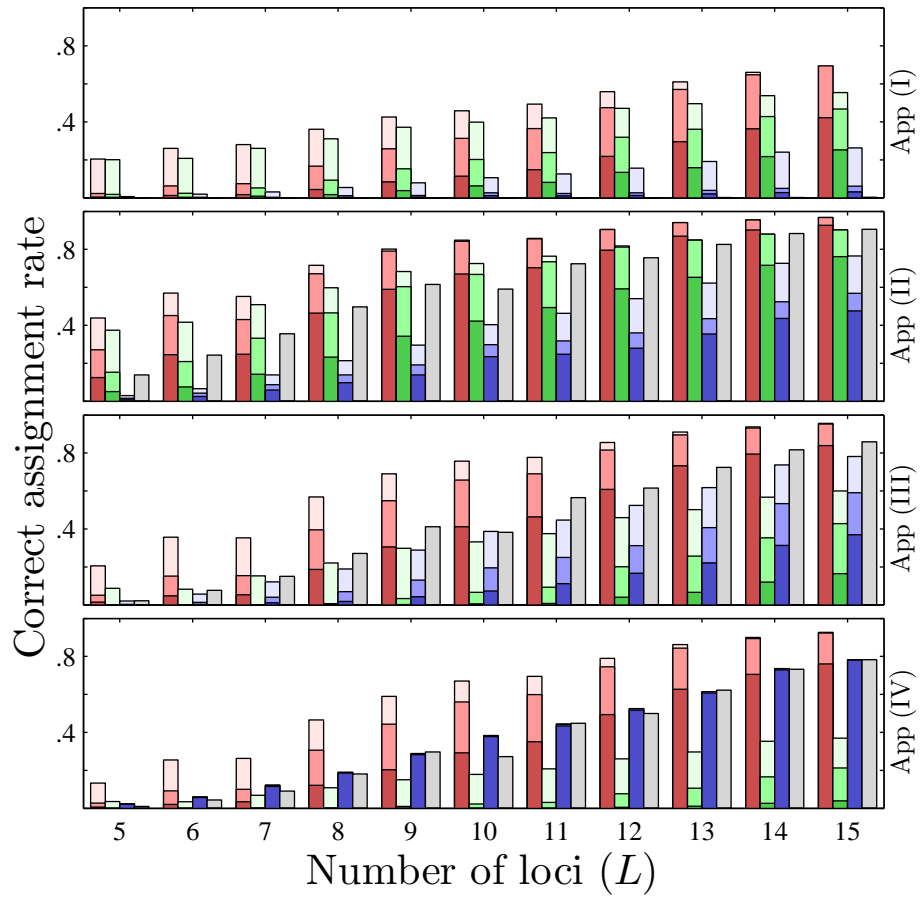

Figure 3:

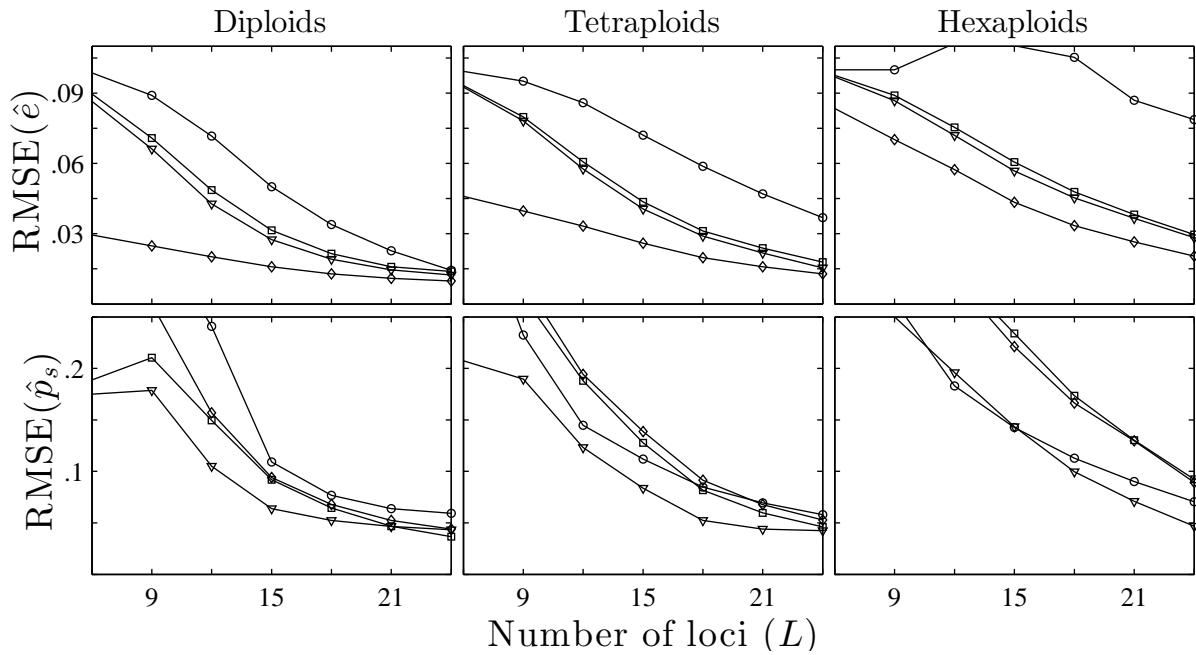

Figure 4:

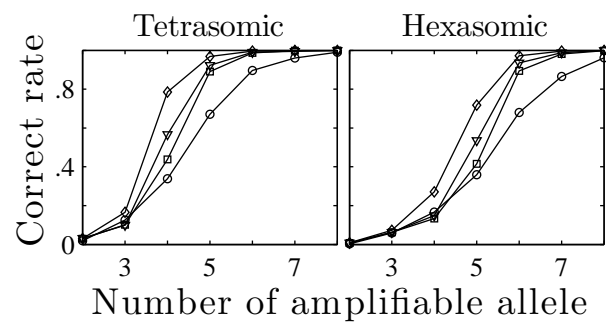

Figure 5:

# Supplementary materials of ‘Performing Parentage Analysis for Polysomic Inheritances Based on Allelic Phenotypes’

## Appendices

### A Double-reduction models

In the presence of double-reduction, a gamete will carry some *identical-by-double-reduction* (IBDR) alleles. For tetrasomic and hexasomic inheritances, there are only two and three allele copies within a gamete, respectively. Hence, there is at most one pair of IBDR alleles within a gamete. Therefore, we only need to use a single parameter to measure the degree of double-reduction.

For polysomic inheritance with a high ploidy level  $v$ , there may be more than one pair of IBDR alleles within a gamete. Therefore, it is necessary to add some additional parameters to measure the degree of double-reduction. Let  $\alpha_i$  be the probability that a gamete carries  $i$  pairs of IBDR alleles. Then  $\sum_{i=0}^{\lfloor v/4 \rfloor} \alpha_i = 1$ , where  $\lfloor v/4 \rfloor$  is the greatest integer not more than  $v/4$ . We call each  $\alpha_i$  a *double-reduction rate*.

Geneticists have developed several simplified models to simulate double-reduction. In the *random chromosome segregation* (RCS) model, the crossing over between the target locus and the corresponding centromere is ignored. Therefore, there cannot be any IBDR allele in a gamete, and the genotypic frequencies accord with the HWE (Figure S1(A), Muller, 1914).

The *pure random chromatid segregation* (PRCS) model accounts for such crossings over, and assumes that the chromatids behave independently in the meiotic anaphase, and are randomly segregated into some gametes (Figure S1(B), Haldane, 1930). When a pair of sister chromatids are segregated into the same gamete, the double-reduction occurs.

In the *complete equational segregation* (CES) model, the whole arms of two pairing chromatids are supposed to be exchanged between the pairing chromosomes (Figure S1(C), Mather, 1935). Subsequently, the chromosomes are randomly segregated into the secondary oocytes in Metaphase I. If the pairing chromosomes are segregated into the same secondary oocyte, the duplicated alleles may be further segregated into a single gamete.

The probability that an allele within a chromatid is exchanged with a pairing chromatid is called the *single chromatid recombination rate*, denoted by  $r_s$ . In the CES model, the rate  $r_s$  is assumed to be one. This is an ideal assumption. In fact, the maximum value of  $r_s$  is 50% whenever the locus is located far from the centromere. Huang *et al.* (2019) presented a model by incorporating  $r_s$  into CES, called the *partial equational segregation* (PES) model. Let  $d$  be the distance (in centimorgans) from the target locus to its corresponding centromere. According to the Haldane’s mapping function, the relational expression between  $r_s$  and  $d$  is as follows:

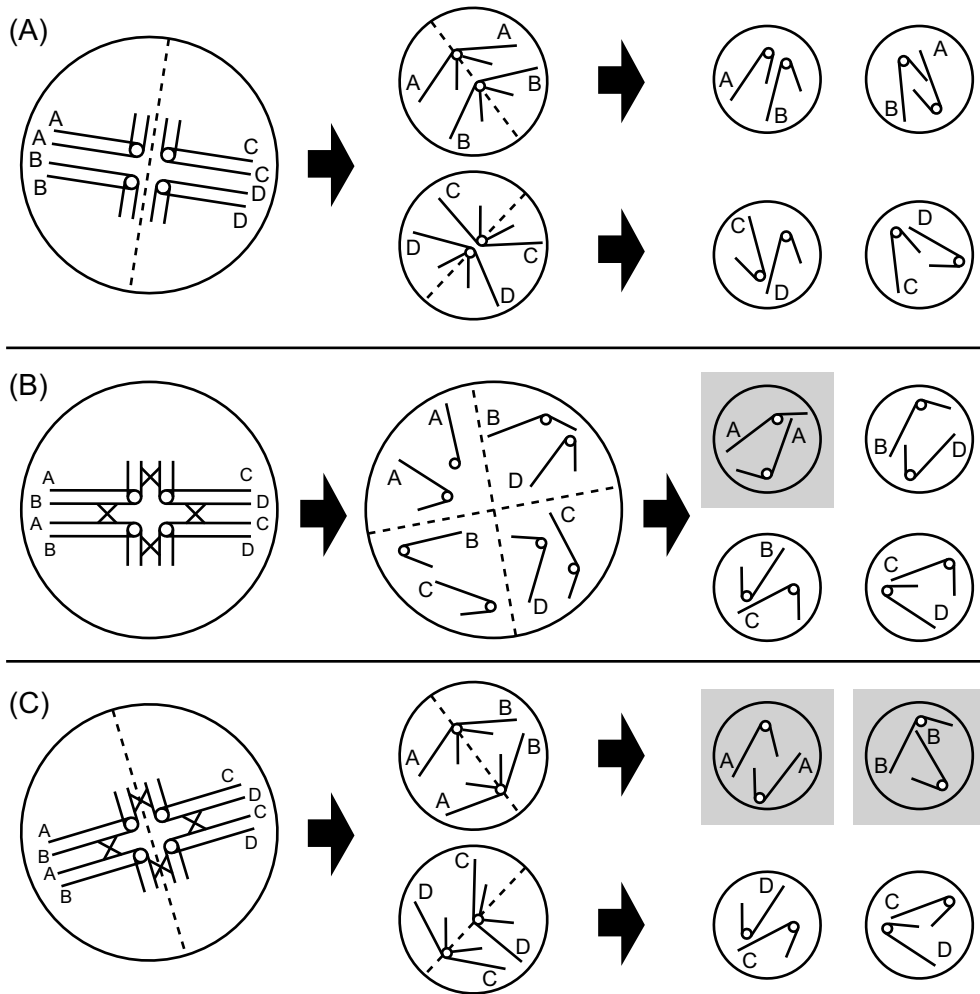

Figure S1: Diagram of double-reduction models under tetrasomic inheritance. The left column shows three primary oocytes, the middle column shows two secondary oocytes (in the rows marked (A) and (C)) or one tetrad (in the row marked (B)), and the right column shows three gametes. The gametes with a gray background carry IBDR alleles. We denote the cellular fissions by dashed lines, the arms of chromosomes by solid lines, and the centromeres by circles connecting solid lines. Each locus is located in a long arm of chromosomes and the identical-by-descent allele is denoted by the same letter as the corresponding locus. The row marked (A) is the sketch of RCS model. In this model, the crossing over between the target locus and its corresponding centromere is ignored (Muller, 1914). In the absence of crossing over, gametes may originate from any combination of homologous chromosomes, and two sister chromatids are never sorted into the same gamete (Parisod *et al.*, 2010). The row marked (B) is the sketch of PRCS model. This model accounts for the crossing over between the target locus and its corresponding centromere, and assumes that the chromatids behave independently in the meiotic anaphase, and are randomly segregated into the gametes (Haldane, 1930). When a pair of sister chromatids are segregated into the same gamete, the double-reduction occurs. The probability that two chromatids within the same gamete are a pair of sister chromatids is  $4/\binom{8}{2}$ , i.e.  $1/7$ , where 4 is the number of pairs of sister chromatids, and  $\binom{8}{2}$  is the number of ways to sample two chromatids from eight chromatids. The row marked (C) is the sketch of CES model. In this model, the pairs of homologous chromosomes are exchanged with the chromatids via recombination (Mather, 1935). The whole arms of sister chromatids are exchanged into different chromosomes. The probability that two homologous chromosomes within a single secondary oocyte are previously paired at a locus in Prophase I is  $1/3$ . In this case, the fragments of these sister chromatids will be segregated into a single gamete at the ratio of  $1/2$ , so the double-reduction rate is  $1/6$  for tetrasomic inheritance.

$$r_s = \frac{1}{2} [1 - \exp(-2d/100)].$$

In summary, different models are required to satisfy different conditions and their dimensions are also not the same. For example, there is an additional parameter  $r_s$  (or  $d$ ) in the PES model, and thus the number of degrees of freedom in PES is higher. It is noteworthy that all of the four models mentioned above can be incorporated into a generalized framework (i.e. the double-reduction rates are used as the parameters to express the phenotypic probabilities for some models). Comparing with the RCS, PRCS and CES models, the number of parameters for such generalized model increases by  $\lfloor v/4 \rfloor$ . The double-reduction rates in four models are shown in Table S1.

Table S1: The double-reduction rates in four models

| Model | Alpha      | Ploidy level |           |                             |                               |                                        |
|-------|------------|--------------|-----------|-----------------------------|-------------------------------|----------------------------------------|
|       |            | 4            | 6         | 8                           | 10                            | 12                                     |
| RCS   | $\alpha_1$ | 0            | 0         | 0                           | 0                             | 0                                      |
|       | $\alpha_2$ |              |           | 0                           | 0                             | 0                                      |
|       | $\alpha_3$ |              |           |                             |                               | 0                                      |
| PRCS  | $\alpha_1$ | 1/7          | 3/11      | 24/65                       | 140/323                       | 1440/3059                              |
|       | $\alpha_2$ |              |           | 1/65                        | 15/323                        | 270/3059                               |
|       | $\alpha_3$ |              |           |                             |                               | 5/3059                                 |
| CES   | $\alpha_1$ | 1/6          | 3/10      | 27/70                       | 55/126                        | 285/616                                |
|       | $\alpha_2$ |              |           | 3/140                       | 5/84                          | 65/616                                 |
|       | $\alpha_3$ |              |           |                             |                               | 5/1848                                 |
| PES   | $\alpha_1$ | $r_s/6$      | $3r_s/10$ | $\frac{3}{70}r_s(10 - r_s)$ | $\frac{5}{126}r_s(14 - 3r_s)$ | $\frac{5}{616}r_s(84 - 28r_s + r_s^2)$ |
|       | $\alpha_2$ |              |           | $\frac{3}{140}r_s^2$        | $\frac{5}{84}r_s^2$           | $\frac{5}{616}r_s^2(14 - r_s)$         |
|       | $\alpha_3$ |              |           |                             |                               | $\frac{5}{1848}r_s^3$                  |

## B Likelihoods for genotypic data

The likelihood formulas stated in this section are applicable to the genotypic data of both diploids and autopolyploids.

We will first give the likelihood formulas in the absence of self-fertilization, and these formulas are identical to those in Kalinowski *et al.* (2007). For the first category in a parentage analysis (i.e. identifying the father when the mother is unknown), the likelihoods can be expressed as

$$\begin{aligned} \mathcal{L}(H_1) &= \Pr(\mathcal{G}_A) [(1 - e)^2 T(\mathcal{G}_O | \mathcal{G}_A) + 2e(1 - e) \Pr(\mathcal{G}_O) + e^2 \Pr(\mathcal{G}_O)], \\ \mathcal{L}(H_2) &= \Pr(\mathcal{G}_A) [(1 - e)^2 \Pr(\mathcal{G}_O) + 2e(1 - e) \Pr(\mathcal{G}_O) + e^2 \Pr(\mathcal{G}_O)]. \end{aligned} \tag{A1}$$

These two formulas are already listed in Equation (2), in which the second formula can be rewritten as  $\mathcal{L}(H_2) = \Pr(\mathcal{G}_A) \Pr(\mathcal{G}_O)$  by merging similar terms.

For the second category (i.e. identifying the father when the mother is known), the likelihoods can be expressed as



$$\begin{aligned}
\mathcal{L}(H_1) &= \Pr(\mathcal{G}_M) \Pr(\mathcal{G}_A) \{ (1-e)^3 T(\mathcal{G}_O | \mathcal{G}_A, \mathcal{G}_M) \\
&\quad + e(1-e)^2 [T(\mathcal{G}_O | \mathcal{G}_M) + T(\mathcal{G}_O | \mathcal{G}_A) + \Pr(\mathcal{G}_O)] \\
&\quad + 3e^2(1-e) \Pr(\mathcal{G}_O) + e^3 \Pr(\mathcal{G}_O) \}, \\
\mathcal{L}(H_2) &= \Pr(\mathcal{G}_M) \Pr(\mathcal{G}_A) \{ (1-e)^3 T(\mathcal{G}_O | \mathcal{G}_M) + e(1-e)^2 [T(\mathcal{G}_O | \mathcal{G}_M) + 2\Pr(\mathcal{G}_O)] \\
&\quad + 3e^2(1-e) \Pr(\mathcal{G}_O) + e^3 \Pr(\mathcal{G}_O) \},
\end{aligned} \tag{A2}$$

where  $\mathcal{G}_M$  is the observed genotype of the true mother.

For the third category (i.e. identifying the father and the mother jointly), the likelihoods can be expressed as

$$\begin{aligned}
\mathcal{L}(H_1) &= \Pr(\mathcal{G}_{AM}) \Pr(\mathcal{G}_A) \{ (1-e)^3 T(\mathcal{G}_O | \mathcal{G}_A, \mathcal{G}_{AM}) \\
&\quad + e(1-e)^2 [T(\mathcal{G}_O | \mathcal{G}_{AM}) + T(\mathcal{G}_O | \mathcal{G}_A) + \Pr(\mathcal{G}_O)] \\
&\quad + 3e^2(1-e) \Pr(\mathcal{G}_O) + e^3 \Pr(\mathcal{G}_O) \}, \\
\mathcal{L}(H_2) &= \Pr(\mathcal{G}_{AM}) \Pr(\mathcal{G}_A) \Pr(\mathcal{G}_O),
\end{aligned} \tag{A3}$$

where  $\mathcal{G}_{AM}$  is the observed genotype of the alleged mother.

We will now give the likelihood formulas in the presence of self-fertilization. For the first category, the offspring is produced by selfing at a probability of  $s$  and by outcrossing at a probability of  $1-s$ . So, if we denote  $T_{s1}$  for  $(1-s)T(\mathcal{G}_O | \mathcal{G}_A) + sT(\mathcal{G}_O | \mathcal{G}_A, \mathcal{G}_A)$ , then the likelihood formulas can be obtained by replacing  $T(\mathcal{G}_O | \mathcal{G}_A)$  with  $T_{s1}$  in the first formula in Equation (A1), whose expressions are as follows:

$$\begin{aligned}
\mathcal{L}(H_1) &= \Pr(\mathcal{G}_A) [(1-e)^2 T_{s1} + 2e(1-e) \Pr(\mathcal{G}_O) + e^2 \Pr(\mathcal{G}_O)], \\
\mathcal{L}(H_2) &= \Pr(\mathcal{G}_A) \Pr(\mathcal{G}_O).
\end{aligned}$$

For the second category, if the alleged father is not the same individual as the true mother, selfing cannot occur in  $H_1$  but may occur in  $H_2$ . Thus, if we denote  $T_{s2}$  for  $(1-s)T(\mathcal{G}_O | \mathcal{G}_M) + sT(\mathcal{G}_O | \mathcal{G}_M, \mathcal{G}_M)$ , then the likelihood formulas can be obtained by replacing  $T(\mathcal{G}_O | \mathcal{G}_M)$  with  $T_{s2}$  in the second formula in Equation (A2), whose expressions are as follows:

$$\begin{aligned}
\mathcal{L}(H_1) &= \Pr(\mathcal{G}_M) \Pr(\mathcal{G}_A) \{ (1-e)^3 T(\mathcal{G}_O | \mathcal{G}_A, \mathcal{G}_M) \\
&\quad + e(1-e)^2 [T(\mathcal{G}_O | \mathcal{G}_M) + T(\mathcal{G}_O | \mathcal{G}_A) + \Pr(\mathcal{G}_O)] \\
&\quad + 3e^2(1-e) \Pr(\mathcal{G}_O) + e^3 \Pr(\mathcal{G}_O) \}, \\
\mathcal{L}(H_2) &= \Pr(\mathcal{G}_M) \Pr(\mathcal{G}_A) \{ (1-e)^3 T_{s2} + e(1-e)^2 [T_{s2} + 2\Pr(\mathcal{G}_O)] \\
&\quad + 3e^2(1-e) \Pr(\mathcal{G}_O) + e^3 \Pr(\mathcal{G}_O) \}.
\end{aligned}$$

Moreover, if the alleged father is the same individual as the true mother, selfing must have occurred in  $H_1$  and could not have occurred in  $H_2$ . Therefore, the likelihood formulas can be obtained by replacing

$(1 - e)^2 T(\mathcal{G}_O | \mathcal{G}_A)$  with  $(1 - e)^2 T(\mathcal{G}_O | \mathcal{G}_A, \mathcal{G}_A)$  and  $(1 - e)^2 \Pr(\mathcal{G}_O)$  with  $(1 - e)^2 T(\mathcal{G}_O | \mathcal{G}_A)$  in Equation (A1), whose expressions are as follows:

$$\begin{aligned}\mathcal{L}(H_1) &= \Pr(\mathcal{G}_A) \{ (1 - e)^2 T(\mathcal{G}_O | \mathcal{G}_A, \mathcal{G}_A) + 2e(1 - e) \Pr(\mathcal{G}_O) + e^2 \Pr(\mathcal{G}_O) \}, \\ \mathcal{L}(H_2) &= \Pr(\mathcal{G}_A) \{ (1 - e)^2 T(\mathcal{G}_O | \mathcal{G}_A) + 2e(1 - e) \Pr(\mathcal{G}_O) + e^2 \Pr(\mathcal{G}_O) \}.\end{aligned}$$

For the third category, if the alleged father is not the same individual as the alleged mother, selfing cannot happen in  $H_1$  but may happen in  $H_2$ . In this situation, the likelihood formulas are the same as those in Equation (A3). Moreover, if the alleged father is the same individual as the alleged mother, selfing must have occurred in  $H_1$  but could not have occurred in  $H_2$ . Therefore, the likelihood formulas can be obtained by replacing  $T(\mathcal{G}_O | \mathcal{G}_A)$  with  $T(\mathcal{G}_O | \mathcal{G}_A, \mathcal{G}_A)$  in the first formula in Equation (A1), whose expressions are as follows:

$$\begin{aligned}\mathcal{L}(H_1) &= \Pr(\mathcal{G}_A) \{ (1 - e)^2 T(\mathcal{G}_O | \mathcal{G}_A, \mathcal{G}_A) + 2e(1 - e) \Pr(\mathcal{G}_O) + e^2 \Pr(\mathcal{G}_O) \}, \\ \mathcal{L}(H_2) &= \Pr(\mathcal{G}_A) \Pr(\mathcal{G}_O).\end{aligned}$$

For the transitional probability  $T(\mathcal{G}_O | \mathcal{G}_A)$  or  $T(\mathcal{G}_O | \mathcal{G}_A, \mathcal{G}_M)$  and so on in this section, it should be calculated by  $T(G_O | G_F)$  or  $T(G_O | G_F, G_M)$  because these genotypes are assumed correctly genotyped in calculating these transitional probabilities, i.e.  $\mathcal{G}_O = G_O$ ,  $\mathcal{G}_F = G_F$ ,  $\mathcal{G}_M = G_M$ . Similarly, for the genotypic frequency  $\Pr(\mathcal{G}_A)$  or  $\Pr(\mathcal{G}_O)$  and so on in some formula listed in this section, it should be calculated by  $\Pr(G_A)$  or  $\Pr(G_O)$  because the genotyping errors does not change the distribution of genotypes, i.e.  $\Pr(\mathcal{G}) = \Pr(G = \mathcal{G})$ .

For diploids without self-fertilization, the formulas of genotypic frequency and two transitional probabilities have been given in the section *Marshall et al.'s (1998) diploid model*.

For diploids with self-fertilization, the transitional probabilities do not change, but the genotypic frequency is related to the inbreeding coefficient  $F$ , denoted by  $\Pr(G | \mathbf{p}, F)$ , which can be calculated by

$$\Pr(G | \mathbf{p}, F) = \begin{cases} Fp_i + (1 - F)p_i^2 & \text{if } G = A_i A_i, \\ 2(1 - F)p_i p_j & \text{if } G = A_i A_j, \end{cases}$$

where  $F$  can be converted from the selfing rate  $s$  by the relational expression

$$F = \frac{s}{2 - s}.$$

Above two formulas will be extended from disomic to polysomic inheritances in Appendix C.

For autopolyploids without self-fertilization, the genotypic frequency  $\Pr(G)$  from tetrasomic to decasomic inheritances for each double-reduction model has been derived in Huang *et al.* (2019), and the transitional probabilities  $T(G_O | G_F)$  and  $T(G_O | G_F, G_M)$  are given in Appendix D.

For autopolyploids with self-fertilization, the transitional probabilities do not change, but the exact genotypic frequency is unavailable. As an alternative, we give its approximate solution, whose derivation

is given in Appendix C.

## C Genotypic and phenotypic frequencies

We have previously discussed the generalized genotypic frequencies from tetrasomic to decasomic inheritances under any double-reduction model (Huang *et al.*, 2019). We will further incorporate self-fertilization into these genotypic frequencies.

In the presence of self-fertilization, if the ploidy level is high, the calculation of the genotypic frequencies from their analytical expressions is problematic (see Appendix K for details). As an alternative, we give an approximate solution by using the inbreeding coefficient  $F$  as an intermediate variable under the assumption that the inbreeding is only caused by both self-fertilization and double-reduction. The analytical expression of  $F$  at an equilibrium state under both double-reduction and selfing was derived in Huang *et al.* (2019), which is

$$F = \frac{8\alpha + sv}{8\alpha + v(s + v - sv)},$$

where  $s$  is the selfing rate,  $v$  is the ploidy level, and  $\alpha$  is the expected number of pairs of IBDR alleles within a gamete. The value of  $\alpha$  can be calculated by  $\alpha = \sum_i i\alpha_i$ , in which  $\alpha_i$  is a double-reduction rate, whose value is listed in Table S1.

Let's now consider the genotypic frequencies incorporating both inbreeding and double-reduction. Let  $p_1, p_2, \dots, p_K$  be all allele frequencies in a population, and let  $\gamma_k$  be  $(1/F - 1)p_k$ ,  $k = 1, 2, \dots, K$ . Denote  $\mathbf{p} = [p_1, p_2, \dots, p_K]$  and  $\gamma = \sum_{k=1}^K \gamma_k$ . Assume that  $q_1, q_2, \dots, q_K$  are all allele frequencies of an individual, which are drawn from the Dirichlet distribution  $\mathcal{D}(\gamma_1, \gamma_2, \dots, \gamma_K)$  (Pritchard *et al.*, 2000). Denote  $\mathbf{q} = [q_1, q_2, \dots, q_K]$ . Then the probability density function of  $\mathbf{q}$  is

$$f(\mathbf{q} | \mathbf{p}, F) = \Gamma(\gamma) \prod_{k=1}^K \frac{p_k^{\gamma_k - 1}}{\Gamma(\gamma_k)},$$

the expectation  $E(q_k)$  is  $p_k$ , and the variance  $\text{Var}(q_k)$  is  $Fp_k(1 - p_k)$ ,  $k = 1, 2, \dots, K$ . Moreover, for any  $q_k$ , its standardized variance is exactly  $F$ . From this, we see that these conditions accord with those of the definition of Wright's  $F$ -statistics. Hence the inbreeding coefficient  $F$  can be defined as the standardized variance of allele frequencies among individuals in the same population.

Because the correlation between alleles within the same individual relative to the population is explained by the divergence from  $\mathbf{p}$  to  $\mathbf{q}$ , the alleles within the same genotype are independent relative to  $\mathbf{q}$ . Therefore, the frequency  $\Pr(G | \mathbf{q})$  of a genotype  $G$  conditional on  $\mathbf{q}$  is one of terms in the expansion of polynomial  $(p_1 + p_2 + \dots + p_K)^v$ , i.e. the following term:

$$\Pr(G | \mathbf{q}) = \binom{v}{n_1, n_2, \dots, n_K} \prod_{k=1}^K q_k^{n_k},$$

where  $n_k$  is the number of copies of the  $k^{\text{th}}$  allele in  $G$ ,  $k = 1, 2, \dots, K$ .

Next, the frequency  $\Pr(G | \mathbf{p}, F)$  of  $G$  conditional on  $\mathbf{p}$  and  $F$  is the weighted average of all frequencies in the form of  $\Pr(G | \mathbf{q})$ , with  $f(\mathbf{q} | \mathbf{p}, F)d\mathbf{q}$  as a weight, that is

$$\Pr(G | \mathbf{p}, F) = \int_{\Omega} \Pr(G | \mathbf{q})f(\mathbf{q} | \mathbf{p}, F)d\mathbf{q},$$

where the integral domain  $\Omega$  can be expressed as

$$\Omega = \{(q_1, q_2, \dots, q_K) | q_1 + q_2 + \dots + q_K = 1, q_k \geq 0, k = 1, 2, \dots, K\}.$$

Such integral can be converted into the following repeated integral with the multiplicity  $K - 1$ :

$$\Pr(G | \mathbf{p}, F) = \int_0^1 \int_0^{1-q_1} \dots \int_0^{1-q_1-q_2-\dots-q_{K-2}} \Pr(G | \mathbf{q})f(\mathbf{q} | \mathbf{p}, F)dq_1 dq_2 \dots dq_{K-1}.$$

It can now be calculated from the expressions of  $\Pr(G | \mathbf{q})$  and  $f(\mathbf{q} | \mathbf{p}, F)$  mentioned above that

$$\Pr(G | \mathbf{p}, F) = \binom{v}{n_1, n_2, \dots, n_K} \prod_{k=1}^K \prod_{j=0}^{n_k-1} (\gamma_k + j) \Big/ \prod_{j'=0}^{v-1} (\gamma + j'). \quad (\text{A4})$$

Equation (A4) is the approximate solution with  $F$  as an intermediate variable. Here, if self-fertilization is considered, the genotypic frequency  $\Pr(\mathcal{G})$  should be calculated by Equation (A4), otherwise, the formula of  $\Pr(\mathcal{G})$  under each double-reduction model is given in Huang *et al.* (2019).

Based on the derivation above, we are now able to express the phenotypic frequencies whilst considering the presence of negative amplifications. If  $\beta$  is the negative amplification rate, the frequency  $\Pr(\mathcal{P})$  for each phenotype  $\mathcal{P}$  is the weighted average of  $\mathcal{B}_{\mathcal{P}=\emptyset}$  and  $\sum_{\mathcal{G} \triangleright \mathcal{P}} \Pr(\mathcal{G})$  with  $\beta$  and  $1 - \beta$  as their weights, i.e.

$$\Pr(\mathcal{P}) = \beta \mathcal{B}_{\mathcal{P}=\emptyset} + (1 - \beta) \sum_{\mathcal{G} \triangleright \mathcal{P}} \Pr(\mathcal{G}). \quad (\text{A5})$$

Besides, if the negative amplifications are not considered, it only needs to set  $\beta$  as zero in Equation (A5).

## D Transitional probabilities

In our model with a ploidy level greater than two, we establish two formulas of transitional probabilities  $T(G_O | G_F)$  and  $T(G_O | G_F, G_M)$ , whose expressions are as follows:

$$\begin{aligned} T(G_O | G_F) &= \sum_{g_F \subset G_F \uplus G_F} T(g_F | G_F) \Pr(G_O \setminus g_F), \\ T(G_O | G_F, G_M) &= \sum_{g_F \subset G_F \uplus G_F} T(g_F | G_F) T(G_O \setminus g_F | G_M), \end{aligned} \quad (\text{A6})$$

where the operations  $\uplus$  and  $\setminus$  are respectively the union and difference of multisets,  $G_O$ ,  $G_F$  and  $G_M$  are in turn the genotypes of the offspring, the father and the mother at a locus,  $g_F$  and  $G_O \setminus g_F$  are the

genotypes of the sperm and the egg that form the offspring,  $\Pr(G_O \setminus g_F)$  is gamete frequency of the egg, and  $T(g_F | G_F)$  and  $T(G_O \setminus g_F | G_M)$  are two transitional probabilities from a zygote to a gamete, which have been derived in Equation (A7).

It is noteworthy that there cannot be any double-reduction under the RCS model or the PES model with  $r_s = 0$  (see Table S1), then the double-reduction should not be considered. In other words, the expression  $g_F \subset G_F \uplus G_F$  in Equation (A6) has to be replaced by  $g_F \subset G_F$  under these situations.

Huang *et al.* (2019) derived the generalized gamete frequency  $\Pr(g)$  and zygote frequency  $\Pr(G)$  (Huang *et al.*, 2019). They also derived the generalized transitional probability  $T(g | G)$  from a zygote  $G$  to a gamete  $g$ , which can be used at any even ploidy level  $v$  and under any double-reduction model, whose expression is

$$T(g | G) = \sum_{i=0}^{\lfloor v/4 \rfloor} \sum_{j_1+j_2+\dots+j_K=i} \frac{\prod_{k=1}^K \delta_k \binom{n_k}{j_k} \binom{n_k-j_k}{m_k-2j_k}}{\binom{v}{i} \binom{v-i}{v/2-2i}} \alpha_i, \quad (\text{A7})$$

where  $n_k$  (or  $m_k$ ) is the number of copies of the  $k^{\text{th}}$  allele in  $G$  (or in  $g$ ),  $\alpha_i$  is a double-reduction rate, and  $\delta_k$  is a binary variable, which is used to exclude the values outside the variation range  $D$  of  $j_k$ , such that  $\delta_k = 1$  if  $j_k \in D$ , or  $\delta_k = 0$  if  $j_k \notin D$ . The variation range  $D$  of  $j_k$  can be expressed as

$$\max(0, m_k - n_k) \leq j_k \leq \min(n_k, m_k/2).$$

In fact, for the binomial coefficient  $\binom{n_k}{j_k}$ ,  $n_k$  and  $j_k$  should satisfy the condition  $0 \leq j_k \leq n_k$ . Similarly, for  $\binom{n_k-j_k}{m_k-2j_k}$ , we have  $0 \leq m_k - 2j_k \leq n_k - j_k$ , or equivalently  $m_k - n_k \leq j_k \leq m_k/2$ . Therefore, the expression of  $D$  holds.

## E Likelihoods under phenotype method

Under the PHENOTYPE method, if self-fertilization is not considered, the likelihoods for the first category in a parentage analysis can be expressed as

$$\begin{aligned} \mathcal{L}(H_1) &= \Pr(\mathcal{P}_A) [(1-e)^2 T(\mathcal{P}_O | \mathcal{P}_A) + 2e(1-e) \Pr(\mathcal{P}_O) + e^2 \Pr(\mathcal{P}_O)], \\ \mathcal{L}(H_2) &= \Pr(\mathcal{P}_A) \Pr(\mathcal{P}_O). \end{aligned}$$

For the second category, the likelihoods can be expressed as

$$\begin{aligned} \mathcal{L}(H_1) &= \Pr(\mathcal{P}_M) \Pr(\mathcal{P}_A) \{ (1-e)^3 T(\mathcal{P}_O | \mathcal{P}_A, \mathcal{P}_M) \\ &\quad + e(1-e)^2 [T(\mathcal{P}_O | \mathcal{P}_M) + T(\mathcal{P}_O | \mathcal{P}_A) + \Pr(\mathcal{P}_O)] \\ &\quad + 3e^2(1-e) \Pr(\mathcal{P}_O) + e^3 \Pr(\mathcal{P}_O) \}, \\ \mathcal{L}(H_2) &= \Pr(\mathcal{P}_M) \Pr(\mathcal{P}_A) \{ (1-e)^3 T(\mathcal{P}_O | \mathcal{P}_M) + e(1-e)^2 [T(\mathcal{P}_O | \mathcal{P}_M) + 2 \Pr(\mathcal{P}_O)] \\ &\quad + 3e^2(1-e) \Pr(\mathcal{P}_O) + e^3 \Pr(\mathcal{P}_O) \}. \end{aligned}$$

For the third category, they can be expressed as

$$\begin{aligned}\mathcal{L}(H_1) &= \Pr(\mathcal{P}_{AM}) \Pr(\mathcal{P}_A) \{(1-e)^3 T(\mathcal{P}_O | \mathcal{P}_A, \mathcal{P}_{AM}) \\ &\quad + e(1-e)^2 [T(\mathcal{P}_O | \mathcal{P}_{AM}) + T(\mathcal{P}_O | \mathcal{P}_A) + \Pr(\mathcal{P}_O)] \\ &\quad + 3e^2(1-e) \Pr(\mathcal{P}_O) + e^3 \Pr(\mathcal{P}_O)\}, \\ \mathcal{L}(H_2) &= \Pr(\mathcal{P}_{AM}) \Pr(\mathcal{P}_A) \Pr(\mathcal{P}_O),\end{aligned}$$

where  $\Pr(\mathcal{P}_A)$ ,  $\Pr(\mathcal{P}_O)$ ,  $\Pr(\mathcal{P}_M)$  and  $\Pr(\mathcal{P}_{AM})$  are calculated by Equation (A5),  $T(\mathcal{P}_O | \mathcal{P}_A)$ ,  $T(\mathcal{P}_O | \mathcal{P}_M)$  and  $T(\mathcal{P}_O | \mathcal{P}_{AM})$  by Equation (3), and  $T(\mathcal{P}_O | \mathcal{P}_A, \mathcal{P}_M)$  and  $T(\mathcal{P}_O | \mathcal{P}_A, \mathcal{P}_{AM})$  by Equation (4).

If self-fertilization is considered, like the situations of Appendix B, each pair of likelihood formulas can be obtained by modifying the existing formulas. For the first category, the likelihood formulas are

$$\begin{aligned}\mathcal{L}(H_1) &= \Pr(\mathcal{P}_A) [(1-e)^2 T_{s1} + 2e(1-e) \Pr(\mathcal{P}_O) + e^2 \Pr(\mathcal{P}_O)], \\ \mathcal{L}(H_2) &= \Pr(\mathcal{P}_A) \Pr(\mathcal{P}_O),\end{aligned}$$

where  $T_{s1} = (1-s)T(\mathcal{P}_O | \mathcal{P}_A) + sT(\mathcal{P}_O | \mathcal{P}_A, \mathcal{P}_A)$ . For the second category, if  $A \neq M$ , then

$$\begin{aligned}\mathcal{L}(H_1) &= \Pr(\mathcal{P}_M) \Pr(\mathcal{P}_A) \{(1-e)^3 T(\mathcal{P}_O | \mathcal{P}_A, \mathcal{P}_M) \\ &\quad + e(1-e)^2 [T(\mathcal{P}_O | \mathcal{P}_M) + T(\mathcal{P}_O | \mathcal{P}_A) + \Pr(\mathcal{P}_O)] \\ &\quad + 3e^2(1-e) \Pr(\mathcal{P}_O) + e^3 \Pr(\mathcal{P}_O)\}, \\ \mathcal{L}(H_2) &= \Pr(\mathcal{P}_M) \Pr(\mathcal{P}_A) \{(1-e)^3 T_{s2} + e(1-e)^2 [T_{s2} + 2 \Pr(\mathcal{P}_O)] \\ &\quad + 3e^2(1-e) \Pr(\mathcal{P}_O) + e^3 \Pr(\mathcal{P}_O)\},\end{aligned}$$

where  $T_{s2} = (1-s)T(\mathcal{P}_O | \mathcal{P}_M) + sT(\mathcal{P}_O | \mathcal{P}_M, \mathcal{P}_M)$ ; if  $A \equiv M$ , then

$$\begin{aligned}\mathcal{L}(H_1) &= \Pr(\mathcal{P}_A) \{(1-e)^2 T(\mathcal{P}_O | \mathcal{P}_A, \mathcal{P}_A) + 2e(1-e) \Pr(\mathcal{P}_O) + e^2 \Pr(\mathcal{P}_O)\}, \\ \mathcal{L}(H_2) &= \Pr(\mathcal{P}_A) \{(1-e)^2 T(\mathcal{P}_O | \mathcal{P}_A) + 2e(1-e) \Pr(\mathcal{P}_O) + e^2 \Pr(\mathcal{P}_O)\},\end{aligned}$$

where  $T(\mathcal{P}_O | \mathcal{P}_A, \mathcal{P}_A)$  and  $T(\mathcal{P}_O | \mathcal{P}_M, \mathcal{P}_M)$  are calculated by Equation (4). For the third category, if  $A \neq AM$ , then

$$\begin{aligned}\mathcal{L}(H_1) &= \Pr(\mathcal{P}_{AM}) \Pr(\mathcal{P}_A) \{(1-e)^3 T(\mathcal{P}_O | \mathcal{P}_A, \mathcal{P}_{AM}) \\ &\quad + e(1-e)^2 [T(\mathcal{P}_O | \mathcal{P}_{AM}) + T(\mathcal{P}_O | \mathcal{P}_A) + \Pr(\mathcal{P}_O)] \\ &\quad + 3e^2(1-e) \Pr(\mathcal{P}_O) + e^3 \Pr(\mathcal{P}_O)\}, \\ \mathcal{L}(H_2) &= \Pr(\mathcal{P}_{AM}) \Pr(\mathcal{P}_A) \Pr(\mathcal{P}_O);\end{aligned}$$

if  $A \equiv AM$ , then

$$\begin{aligned}\mathcal{L}(H_1) &= \Pr(\mathcal{P}_A)\{(1-e)^2T(\mathcal{P}_O|\mathcal{P}_A,\mathcal{P}_A) + 2e(1-e)\Pr(\mathcal{P}_O) + e^2\Pr(\mathcal{P}_O)\}, \\ \mathcal{L}(H_2) &= \Pr(\mathcal{P}_A)\Pr(\mathcal{P}_O).\end{aligned}$$

## F Estimation of genotyping error rate (continuous)

In this appendix, we will use the trio mismatches to describe how to estimate the genotyping error rate. The trio mismatch in a true parents-offspring trio may be caused by the genotyping errors in this offspring or in the parents. If the offspring or if both parents are erroneously genotyped, the probability of observing a trio mismatch is equal to the exclusion rate for the third category, denoted by  $\delta_o$ . If only one parent is erroneously genotyped, the probability of observing a trio mismatch is equal to the exclusion rate for the second category, denoted by  $\delta_p$ . Moreover, if each individual in a selfed trio is erroneously genotyped, the probability of observing a trio mismatch is denoted by  $\delta_s$ . Therefore, the probability  $\gamma$  of observing a trio mismatch in a true parents-offspring trio can be expressed as

$$\gamma = e[(1-s_t)(\delta_o + 2\delta_p) + 2s_t\delta_s] + e^2[(1-s_t)(\delta_o - 4\delta_p) - s_t\delta_s] + e^3(1-s_t)(\delta_o - 2\delta_p), \quad (\text{A8})$$

where  $s_t$  is the frequency of selfing in the reference trios.

The values of  $s_t$  and  $\gamma$  can be estimated from the reference trios identified from a single application or from multiple applications based on the same dataset, and  $\delta_o$  and  $\delta_s$  can be estimated from a similar Monte-Carlo algorithm mentioned above. The procedures are broadly as follows: randomly sample three (or two) individuals, considering them as a trio (or a selfed trio), and next calculate the probability that the genotypes/phenotypes at a locus of this trio (or this selfed trio) are mismatched, which is used as  $\hat{\delta}_o$  (or  $\hat{\delta}_s$ ) at this locus.

Under the assumption of random mating, the joint distribution of parental genotypes/phenotypes is the product of two observed genotypic/phenotypic frequencies, such that we can randomly sample two individuals and assume they are parents in the estimation of  $\delta_o$ . However, in the estimation of  $\delta_p$ , the joint distribution of parent-offspring genotypes/phenotypes cannot be estimated via this method. That is because the parent-offspring genotypes are correlated. As an alternative, we use the empirical distribution of genotypes/phenotypes of reference pairs to approximate the joint distribution of parent-offspring genotypes/phenotypes. More specifically, we randomly sample a matched pair (as a mother-offspring pair) from the reference pairs and an individual (as an alleged father) from all samples, considering them as a trio, and calculate the probability that the genotypes/phenotypes at a locus of this trio are mismatched, which is used as  $\hat{\delta}_p$  at this locus.

The single-locus estimate  $\hat{e}_l$  at the  $l^{\text{th}}$  locus can be obtained by solving Equation (A8), whose variance  $\text{Var}(\hat{e}_l)$  can be approximately expressed as  $\text{Var}(\hat{e}_l) \approx e/(n_{rl}\hat{\delta}_l)$ . Moreover, the multi-locus estimate  $\hat{e}$  is the weighted average of single-locus estimates across all loci, that is  $\hat{e} = \sum_l w_l \hat{e}_l$ , where  $w_l = n_{rl}\hat{\delta}_l / (\sum_{l'} n_{rl'}\hat{\delta}_{l'})$ . The variance  $\text{Var}(\hat{e})$  can be approximately expressed as  $\text{Var}(\hat{e}) \approx e / (\sum_l n_{rl}\hat{\delta}_l)$ .

## G Estimation of sample rate (continuous)

Assume that the assignment rates  $a_c$  and  $a_u$  as well as the selfing rate  $s_u$  can be reliably estimated under an application and a confidence level, and that  $n_c$  is the number of cases. Because the number of assigned cases  $n_a$  obeys the binomial distribution  $B(n_c; a)$ , the assignment rate  $a$  can be estimated by  $\hat{a} = n_a/n_c$ . Therefore, the sample rate  $p_s$  can be estimated by Equation (5), (6) or (7), and the variance  $\text{Var}(\hat{p}_s)$  can be calculated by the formula  $\text{Var}(\hat{p}_s) = E(\hat{p}_s^2) - [E(\hat{p}_s)]^2$ .

However, it is unfortunate that the true value of  $a$  is unknown, then we cannot directly apply the binomial distribution  $B(n_c; a)$  to perform various calculations. As an alternative, we select the uniform distribution  $U(0, 1)$  as the prior distribution obeyed by  $a$ , and then give the posterior distribution obeyed by  $a$  according to the Bayes formula, where the expected value  $E(a)$  for the posterior distribution is

$$E(a) = \frac{n_a + 1}{n_c + 2}.$$

Now, we can perform various calculations so long as we let the value of  $a$  in  $B(n_c; a)$  be equal to  $\frac{n_a+1}{n_c+2}$ .

In actual conditions, multiple applications and multiple confidence levels will be used jointly to increase the accuracy of sample rate estimation. For convenience, we denote  $\hat{p}_{si}$  for the estimated value of  $p_s$  under an application and a confidence level. According to the previous derivations,  $\hat{p}_{si}$  together with its variance can be calculated under the assumption that  $a_c$ ,  $a_u$  and  $s_u$  can be reliably estimated. Like the estimation of genotyping error rate, the estimate  $\hat{p}_s$  is the weighted average of the estimated values of  $p_s$  under all selected applications and all selected confidence levels, symbolically  $\hat{p}_s = (\sum_i w_i \hat{p}_{si}) / (\sum_i w_i)$ , where  $w_i = 1/\text{Var}(\hat{p}_{si})$ .

Finally, let's consider the estimation of selfing rate  $s_u$  under multiple confidence levels. In actual conditions, the loci may be insufficient, causing that there are only few cases to assign the parent at a high confidence level (e.g.  $\Delta > \Delta_{0.99}$ ). Besides, the genotyping error rate may be high, causing that the false parent may be assigned at a low confidence level (e.g.  $\Delta > 0$ ) when the true parent is not sampled. To avoid these problems, we jointly use three confidence levels (80%, 95% and 99%) in POLYGENE for each application.

The estimated value  $\hat{s}_u$  is the ratio of  $n_s$  to  $n_a$ , i.e.  $\hat{s}_u = n_s/n_a$  under an application and a confidence level, where  $n_s$  is the number of selfing cases. If we select the three confidence levels 99%, 95% and 80%, then  $\hat{s}_u$  is the weighted average of the corresponding ratio values of  $n_s$  to  $n_a$ , that is

$$\hat{s}_u = \frac{n_{s,0.99} + n_{s,0.95} + n_{s,0.80}}{n_{a,0.99} + n_{a,0.95} + n_{a,0.80}}.$$

## H Pseudo-dominant approach

The pseudo-dominant approach was used in Rodzen *et al.* (2004) and Wang and Scribner (2014). In this approach, the codominant data are converted into the dominant data. More specifically, each visible



allele is defined as a virtual dominant marker, whose observed phenotype is either present (denoted by  $\{A\}$ ) if this allele is detected, or absent (denoted by  $\emptyset$ ) if this allele is not detected. We denote  $\mathcal{P}^D$  for the phenotype at a dominant marker. Moreover, the LOD scores are calculated by the diploid likelihood formulas listed below. These formulas are originally derived in Gerber *et al.* (2000) by using the transitional probability  $T(\mathcal{G} | G)$  from a true genotype  $G$  to an observed genotype  $\mathcal{G}$  based on an alternative genotyping error model, where

$$T(\mathcal{G} | G) = (1 - e) \Pr(\mathcal{G}) \mathcal{B}_{G=\mathcal{G}} + e \mathcal{B}_{G \neq \mathcal{G}}.$$

The above formula is different to that listed in Equation (1). Because the possible phenotypes at a dominant marker are  $\{A\}$  and  $\emptyset$ , the degree-of-freedom is only one. Therefore, the null allele frequency, the selfing rate and the negative amplification rate cannot be estimated. Besides, we will use the formulas and the model given in Rodzen *et al.* (2004) to evaluate the efficiency of this approach.

Next, the transitional probability from one phenotype or a pair of phenotypes to another phenotype at a dominant marker is described in Tables 1 and 2 in Gerber *et al.* (2000).

The phenotypic frequency at a dominant marker in diploids is

$$\Pr(\mathcal{P}^D) = \begin{cases} (1 - p)^2 & \text{if } \mathcal{P}^D = \emptyset, \\ 1 - (1 - p)^2 & \text{if } \mathcal{P}^D = \{A\}, \end{cases}$$

where  $p$  is the frequency of the dominant allele  $A$  at this dominant marker, and  $p$  is estimated from the observed phenotypic frequencies, whose estimated expression is  $\hat{p} = 1 - \sqrt{\widehat{\Pr}(\mathcal{P}^D = \emptyset)}$ .

Now, the likelihood formulas listed below can be used for the actual calculation by using these transitional probabilities and phenotypic frequencies: for the first category in a parentage analysis,

$$\begin{aligned} \mathcal{L}(H_1) &= (1 - e)^2 T(\mathcal{P}_O^D | \mathcal{P}_A^D) \Pr(\mathcal{P}_A^D) + e(1 - e) [\Pr(\mathcal{P}_O^D) + \Pr(\mathcal{P}_A^D)] + e^2, \\ \mathcal{L}(H_2) &= (1 - e)^2 \Pr(\mathcal{P}_O^D) \Pr(\mathcal{P}_A^D) + e(1 - e) [\Pr(\mathcal{P}_O^D) + \Pr(\mathcal{P}_A^D)] + e^2; \end{aligned}$$

for the second category,

$$\begin{aligned} \mathcal{L}(H_1) &= (1 - e)^3 T(\mathcal{P}_O^D | \mathcal{P}_A^D, \mathcal{P}_M^D) \Pr(\mathcal{P}_A^D) \Pr(\mathcal{P}_M^D) + \\ &\quad e(1 - e)^2 [\Pr(\mathcal{P}_A^D) \Pr(\mathcal{P}_M^D) + T(\mathcal{P}_O^D | \mathcal{P}_M^D) \Pr(\mathcal{P}_M^D) + T(\mathcal{P}_O^D | \mathcal{P}_A^D) \Pr(\mathcal{P}_A^D)] + \\ &\quad e^2(1 - e) [\Pr(\mathcal{P}_O^D) + \Pr(\mathcal{P}_A^D) + \Pr(\mathcal{P}_M^D)] + e^3, \\ \mathcal{L}(H_2) &= (1 - e)^3 T(\mathcal{P}_O^D | \mathcal{P}_M^D) \Pr(\mathcal{P}_A^D) \Pr(\mathcal{P}_M^D) + \\ &\quad e(1 - e)^2 [\Pr(\mathcal{P}_A^D) \Pr(\mathcal{P}_M^D) + T(\mathcal{P}_O^D | \mathcal{P}_M^D) \Pr(\mathcal{P}_M^D) + \Pr(\mathcal{P}_O^D) \Pr(\mathcal{P}_A^D)] + \\ &\quad e^2(1 - e) [\Pr(\mathcal{P}_O^D) + \Pr(\mathcal{P}_A^D) + \Pr(\mathcal{P}_M^D)] + e^3; \end{aligned}$$

for the third category,

$$\begin{aligned}
\mathcal{L}(H_1) &= (1-e)^3 T(\mathcal{P}_O^D | \mathcal{P}_A^D, \mathcal{P}_M^D) \Pr(\mathcal{P}_A^D) \Pr(\mathcal{P}_M^D) + \\
&\quad e(1-e)^2 [\Pr(\mathcal{P}_A^D) \Pr(\mathcal{P}_M^D) + T(\mathcal{P}_O^D | \mathcal{P}_M^D) \Pr(\mathcal{P}_M^D) + T(\mathcal{P}_O^D | \mathcal{P}_A^D) \Pr(\mathcal{P}_A^D)] + \\
&\quad e^2(1-e) [\Pr(\mathcal{P}_O^D) + \Pr(\mathcal{P}_A^D) + \Pr(\mathcal{P}_M^D)] + e^3, \\
\mathcal{L}(H_2) &= (1-e)^3 \Pr(\mathcal{P}_O^D) \Pr(\mathcal{P}_A^D) \Pr(\mathcal{P}_M^D) + \\
&\quad e(1-e)^2 [\Pr(\mathcal{P}_A^D) \Pr(\mathcal{P}_M^D) + \Pr(\mathcal{P}_O^D) \Pr(\mathcal{P}_M^D) + \Pr(\mathcal{P}_O^D) \Pr(\mathcal{P}_A^D)] + \\
&\quad e^2(1-e) [\Pr(\mathcal{P}_O^D) + \Pr(\mathcal{P}_A^D) + \Pr(\mathcal{P}_M^D)] + e^3.
\end{aligned}$$

## I Exclusion approach

Although the exclusion approach is not as accurate as the likelihood approach, the number of mismatches can be used as a reference. Here, we extend the exclusion approach to polysomic inheritances, and this extended approach can be incorporated into our framework, such that the effects of double-reduction, null alleles, negative amplifications and self-fertilization can all be freely accommodated.

The logic of the exclusion approach is relatively simple: if the alleged parents are able to produce the offspring, they cannot be excluded. We will here give two extended definitions of matches by using the genotypic data.

Given an alleged parent-offspring pair, if there exists a gamete  $g_A$  produced by the alleged parent at a locus, such that  $g_A$  is a subset of the offspring genotype  $\mathcal{G}_O$  at this locus, then such a pair is termed *matched* at this locus. The condition in this definition can be described by symbols as follows:  $\exists g_A \subset \mathcal{G}_A \uplus \mathcal{G}_A$ , such that  $g_A \subset \mathcal{G}_O$ ; or equivalently,  $\max \{ \mathcal{B}_{g'_A \subset \mathcal{G}_O} | g'_A \subset \mathcal{G}_A \uplus \mathcal{G}_A \} = 1$ , where  $\mathcal{G}_A$  is the genotype of the alleged parent at this locus.

Given an alleged parents-offspring trio, if there exist two gametes  $g_F$  and  $g_M$  produced by the alleged father and the alleged mother at a locus, respectively, such that the fusion of  $g_F$  and  $g_M$  results in the offspring genotype  $\mathcal{G}_O$  at this locus, then such a trio is termed *matched* at this locus. Similarly, the conditions in this definition can be described as follows:  $\exists g_F \subset \mathcal{G}_{AF} \uplus \mathcal{G}_{AF}$ ,  $\exists g_M \subset \mathcal{G}_{AM} \uplus \mathcal{G}_{AM}$ , such that  $g_F \uplus g_M = \mathcal{G}_O$ ; or equivalently,

$$\max \{ \mathcal{B}_{g'_F \uplus g'_M = \mathcal{G}_O} | g'_F \subset \mathcal{G}_{AF} \uplus \mathcal{G}_{AF}, g'_M \subset \mathcal{G}_{AM} \uplus \mathcal{G}_{AM} \} = 1,$$

where  $\mathcal{G}_{AF}$  (or  $\mathcal{G}_{AM}$ ) is the genotype of the alleged father (or the alleged mother) at this locus.

Finally, it is important to highlight that under the RCS model or the PES model with  $r_s = 0$ , the expressions, used to describe the two definitions and involved in the double-reduction, should be revised, i.e. we must replace  $g_A \subset \mathcal{G}_A \uplus \mathcal{G}_A$  by  $g_A \subset \mathcal{G}_A$ ,  $g_F \subset \mathcal{G}_{AF} \uplus \mathcal{G}_{AF}$  by  $g_F \subset \mathcal{G}_{AF}$  and  $g_M \subset \mathcal{G}_{AM} \uplus \mathcal{G}_{AM}$  by  $g_M \subset \mathcal{G}_{AM}$ .

## J Allele frequency estimation

We adopt an *expectation-maximization* (EM) algorithm (Dempster *et al.*, 1977) to estimate the allele frequencies for phenotypic data. This algorithm follows the methods of Kalinowski and Taper (2006), which is an iterative algorithm used to maximize the genotypic likelihood. The *genotypic likelihood* at a locus is defined as the product of genotypic frequencies of all individuals at this locus, denoted by  $\mathcal{L}_{\text{geno}}$ , whose logarithmic expression is

$$\ln \mathcal{L}_{\text{geno}} = \sum_{\mathcal{P}} \sum_{\mathcal{G} \triangleright \mathcal{P}} \Pr(\mathcal{G} | \mathcal{P}) \ln[\Pr(\mathcal{G})],$$

in which  $\mathcal{P}$  is taken from the phenotypes of all individuals at this locus,  $\mathcal{G}$  is taken from all genotypes determining  $\mathcal{P}$  at the same locus,  $\Pr(\mathcal{G} | \mathcal{P})$  is the posterior probability of  $\mathcal{G}$  determining  $\mathcal{P}$ , and  $\Pr(\mathcal{G})$  is the frequency of  $\mathcal{G}$ .

The initial frequencies of amplifiable alleles are assumed to be equal to  $1/K$ , where  $K$  is the number of alleles, including the null allele  $A_y$ . The updated frequency  $\hat{p}'_k$  of the  $k^{\text{th}}$  allele  $A_k$  is the weighted average of frequencies of  $A_k$  in all genotypes at a locus, with the posterior probabilities of these genotypes as their weights, whose expression is

$$\hat{p}'_k = \frac{\sum_{\mathcal{P}} \sum_{\mathcal{G} \triangleright \mathcal{P}} \Pr(\mathcal{G} | \mathcal{P}) \Pr(A_k | \mathcal{G})}{\sum_{\mathcal{P}} \sum_{\mathcal{G} \triangleright \mathcal{P}} \Pr(\mathcal{G} | \mathcal{P})}, \quad k = 1, 2, \dots, K,$$

where  $\Pr(A_k | \mathcal{G})$  is the frequency of  $A_k$  in  $\mathcal{G}$ .

Our algorithm also includes simultaneously the estimation of negative amplification rate  $\beta$ . Because the final estimated value of  $\beta$  is independent to the initial value, the initial value can be arbitrarily selected (e.g. 0.05). The updated negative amplification rate  $\hat{\beta}'$  can be expressed as

$$\hat{\beta}' = \frac{N_{\emptyset} \hat{\beta} / \Pr(\mathcal{P} = \emptyset)}{N},$$

where  $N_{\emptyset}$  is the number of negative phenotypes at this locus,  $N$  is the number of all individuals,  $\hat{\beta}$  is the current negative amplification rate, and  $\hat{\beta} / \Pr(\mathcal{P} = \emptyset)$  is the posterior probability that a negative phenotype is the result of negative amplification.

If  $\max\{|\hat{p}_k - \hat{p}'_k| \mid k = 1, 2, \dots, K\}$  and  $|\hat{\beta} - \hat{\beta}'|$  are less than a predefined threshold (e.g.  $10^{-5}$ ) or if the iterative times reach 2000, the iteration is terminated, where  $\hat{p}_k$  is the current frequency of  $A_k$ .

Null alleles and negative amplifications can both be freely incorporated into our model. If the null alleles are not considered, the candidate genotypes extracted from a phenotype only need to be set as ‘not containing  $A_y$ ’. If the negative amplifications are not considered, the initial value of  $\beta$  only needs to be set as zero. If both factors are not considered, the negative phenotype cannot be explained, and so  $\emptyset$  is discarded in the allele frequency estimation together with the subsequent analyses.

We also nest a downhill simplex algorithm (Nelder and Mead, 1965) outside the EM algorithm to estimate the selfing rate  $s$ . The estimated value  $\hat{s}$  is obtained by maximizing the phenotypic likelihood

$\mathcal{L}_{\text{pheno}}$ , that is  $\hat{s} = \arg \max_{s \in [0,1]} \mathcal{L}_{\text{pheno}}$ , where  $\mathcal{L}_{\text{pheno}} = \prod_{\mathcal{P}} \Pr(\mathcal{P})$ .

## K Reasons for computational difficulty

In the absence of selfing, the generalized form of genotypic frequencies can be obtained by two methods (Huang *et al.*, 2019). The first method is the *non-linear method*. In this method, we establish a non-linear equation set with the frequencies  $\Pr(G_1), \Pr(G_2), \dots, \Pr(G_I), \Pr(g_1), \dots, \Pr(g_J)$  as the unknowns and the frequencies  $p_1, p_2, \dots, p_K$  as the parameters, whose expression is as follows:

$$\begin{cases} \Pr(G_i) = \sum_{\mu=1}^J \Pr(g_\mu) \Pr(G_i \setminus g_\mu), & i = 1, 2, \dots, I, \\ \Pr(g_j) = \sum_{\nu=1}^I \Pr(G_\nu) T(g_j | G_\nu), & j = 1, 2, \dots, J, \\ p_k = \sum_{\nu=1}^I \Pr(G_\nu) \Pr(A_k | G_\nu), & k = 1, 2, \dots, K, \end{cases} \quad (\text{A9})$$

where  $I = \binom{2v}{v}$ ,  $J = \binom{v/2+v}{v/2}$ ,  $K = v + 1$  ( $I$ ,  $J$  and  $K$  are the numbers of zygotes, gametes and alleles at a locus, respectively),  $\Pr(G_i \setminus g_\mu) = \Pr(g = G_i \setminus g_\mu)$ ,  $T(g_j | G_\nu)$  is the transitional probability from  $G_\nu$  to  $g_j$ , and  $p_k$  and  $\Pr(A_k | G_\nu)$  are the frequencies of  $A_k$  in the population and in  $G_\nu$ , respectively. If the ploidy level  $v$  is equal to 4, 6, 8 or 10, the number of equations in Equation set (A9) is 90, 1015, 13374 or 187770, and the number of unknowns is 85, 1008, 12265 or 187759. We now see that these numbers will increase rapidly with an increase in ploidy level. Therefore, this will cause a computational difficulty for Equation set (A9) at a high ploidy level.

In order to overcome such a computational difficulty, we adopt another method, named the *linear method*, to obtain the zygote frequencies. For this method, briefly speaking, we will first use Equation set (A9) to calculate the gamete frequencies at a biallelic locus. Next, we split these alleles one by one at this locus until they are split into  $v/2 + 1$  alleles so as to more expediently obtain the zygote frequencies at a multi-allelic locus. Finally, we use the former  $I$  equations in Equation set (A9), i.e.

$$\Pr(G_i) = \sum_{\mu=1}^J \Pr(g_\mu) \Pr(G_i \setminus g_\mu), \quad i = 1, 2, \dots, I,$$

to calculate the zygote frequencies. This method can be described by a linear equation set  $\mathbf{Ax} = \mathbf{b}$ . Because there are no sufficient constraint conditions to obtain a unique solution for such linear equation set when  $v \geq 12$ , this method can only be applied from tetrasomic to decasomic inheritances (Huang *et al.*, 2019).

In the presence of selfing, for the linear method, although the gamete frequencies can be solved for  $v < 12$ , the zygote frequencies cannot be easily calculated from the gamete frequency. That is because for any  $i \in I$ , the  $i^{\text{th}}$  equation in Equation set (A9) should be modified as

$$\Pr(G_i) = (1 - s) \sum_{\nu=1}^J \Pr(g_\nu) \Pr(G_i \setminus g_\nu) + s \sum_{\mu=1}^I \sum_{\nu=1}^J \Pr(G_\mu) T(g_\nu | G_\mu) T(G_i \setminus g_\nu | G_\mu).$$

For the non-linear method, the calculation is more difficult when the ploidy level is high.

## L Supplementary figures

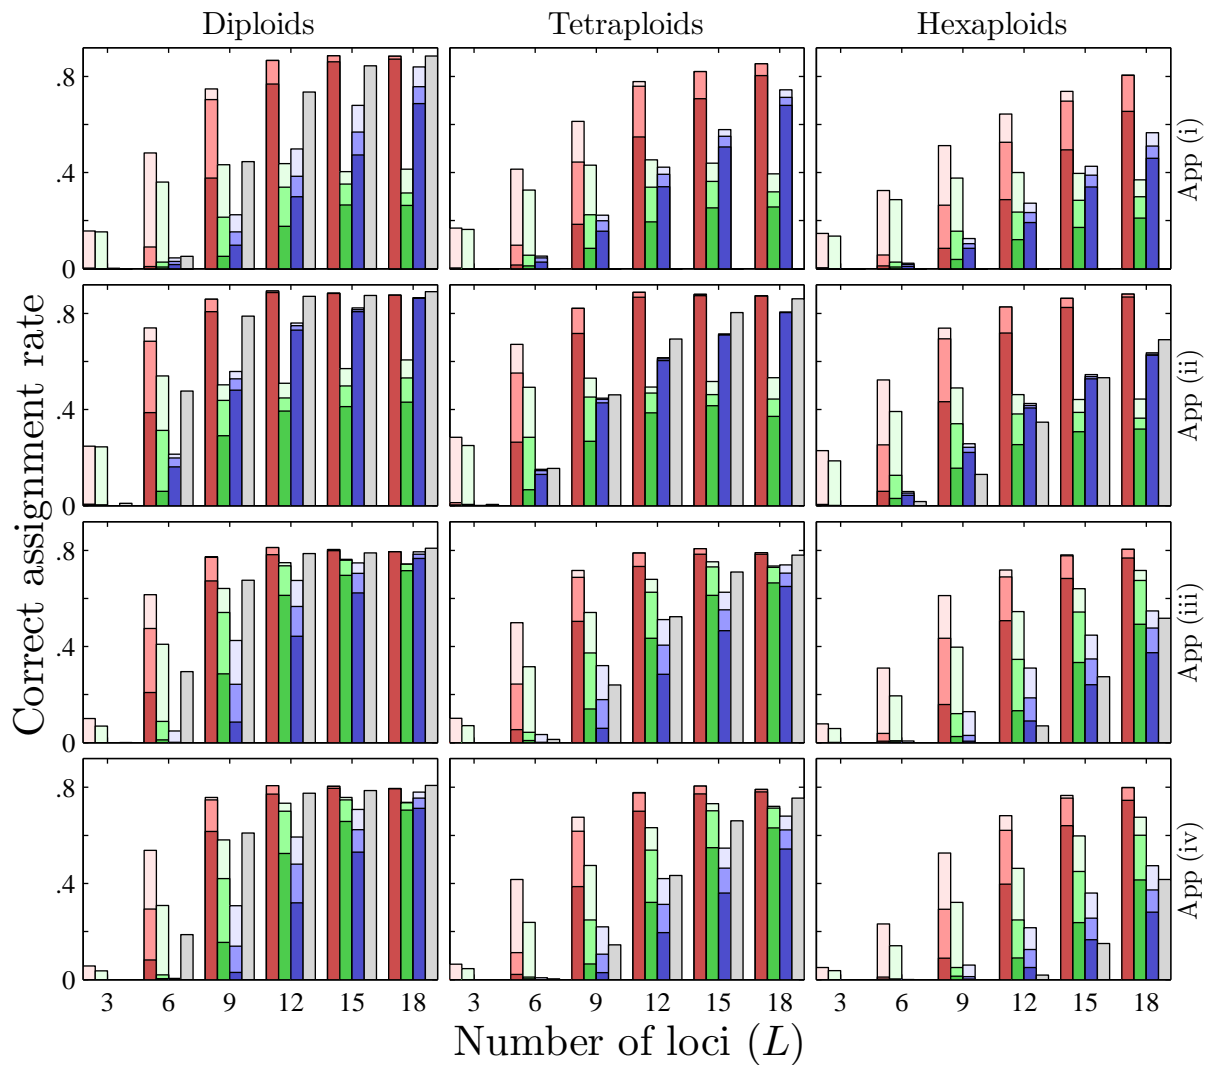

Figure S2: The correct assignment rate as a function of the number of loci  $L$  by using the phenotypic data at the selfing rate 0. The ploidy levels, applications, methods, confidence levels and the definitions of bars together with their shading are as for Figure 2.

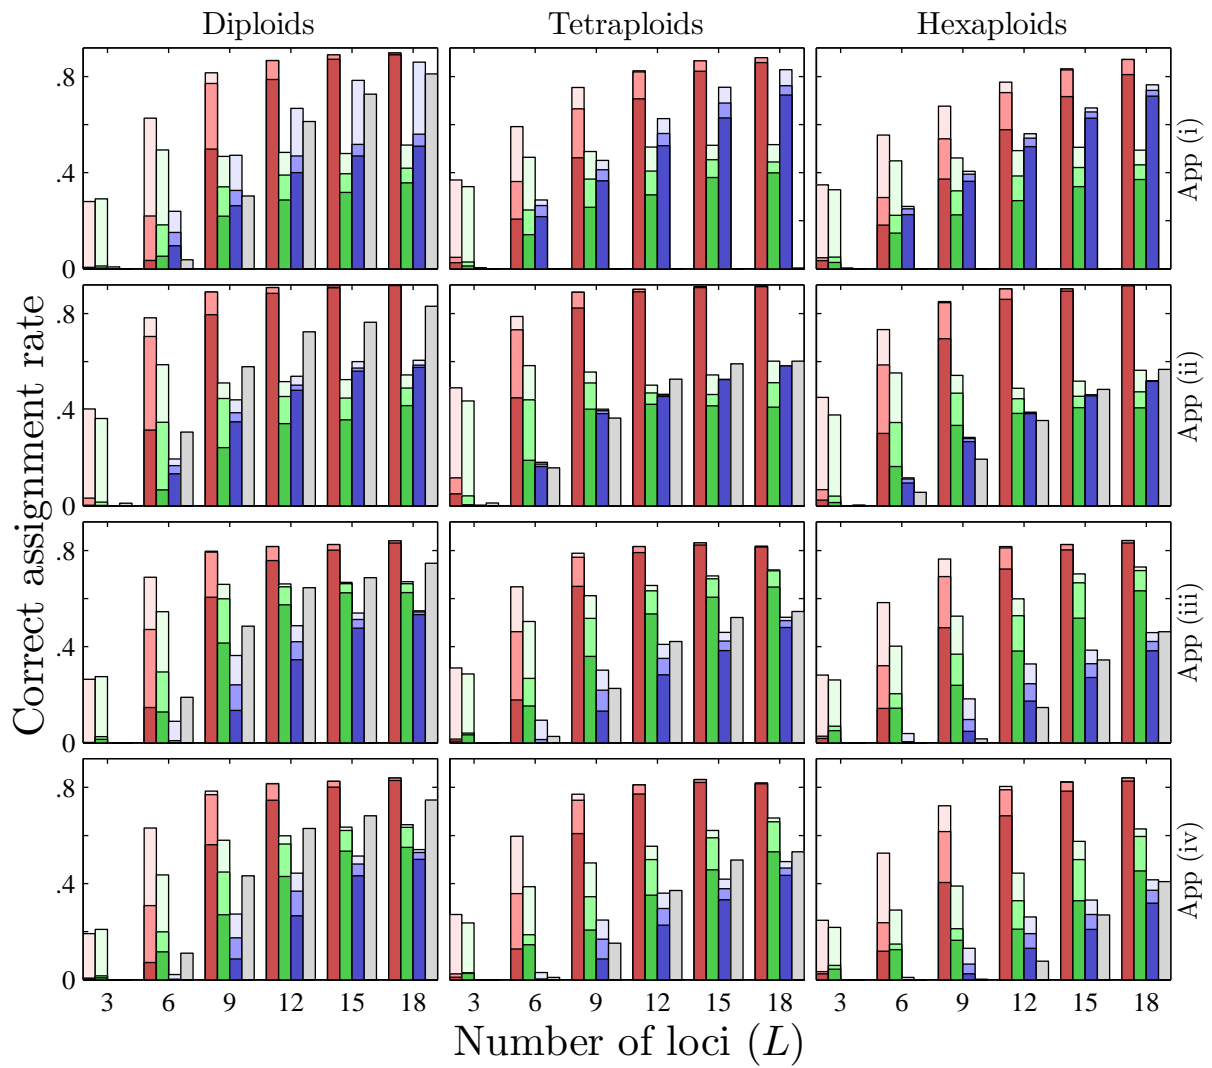

Figure S3: The correct assignment rate as a function of the number of loci  $L$  by using the phenotypic data at the selfing rate 0.3. The remaining are as for Figure 2.

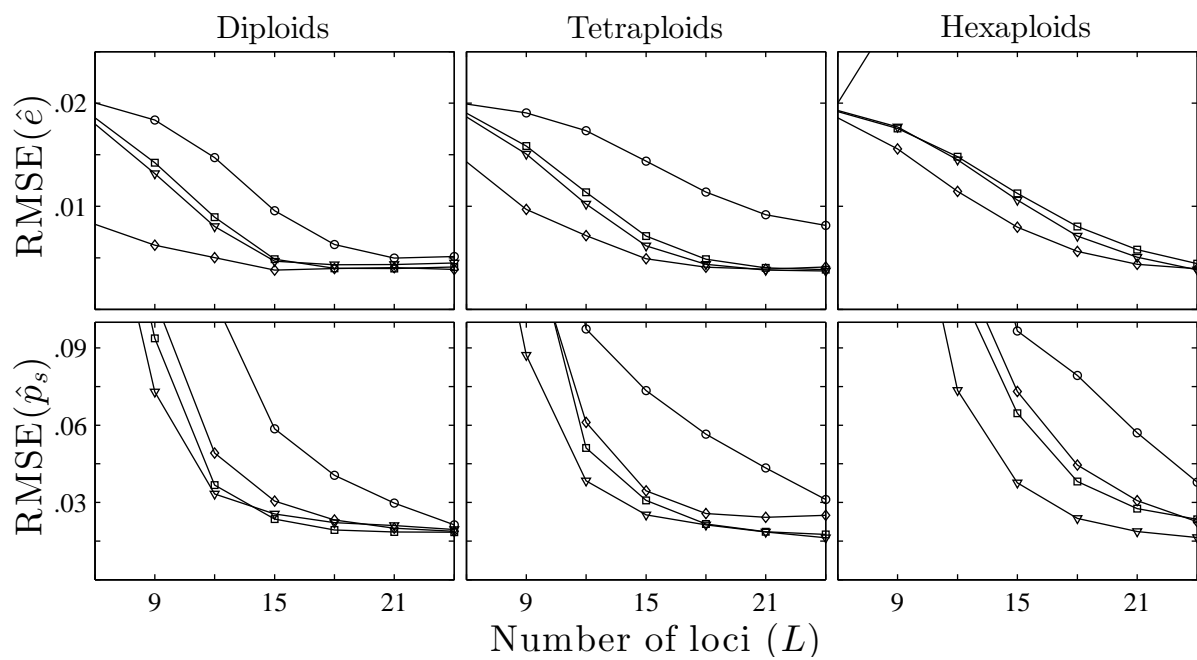

Figure S4: The RMSE of the estimated genotyping error rate  $\hat{e}$  or the estimated sample rate  $\hat{p}_s$  as a function of the number of loci  $L$  at  $e = 0.02$  and  $p_s = 0.8$ . The remaining are as for Figure 4.
